# Supplementary material for: Autologous cultured adipose derived mesenchymal stem cells combined with hyaluronic acid hydrogel in the treatment of discogenic low back pain: a study protocol for a phase II randomised controlled trial
Source: PubMed Central journal article supplement — BMJ Open. 2022 Oct 25;12(10):e063925. doi: 10.1136/bmjopen-2022-063925 (PMC9608519; doi:10.1136/bmjopen-2022-063925), 2022-10-25
Supplement: bmjopen-2022-063925.draft_revisions.pdf [file bmjopen-2022-063925.draft_revisions.pdf]

# BMJ Open

BMJ Open is committed to open peer review. As part of this commitment we make the peer review history of every article we publish publicly available.

When an article is published we post the peer reviewers' comments and the authors' responses online. We also post the versions of the paper that were used during peer review. These are the versions that the peer review comments apply to.

The versions of the paper that follow are the versions that were submitted during the peer review process. They are not the versions of record or the final published versions. They should not be cited or distributed as the published version of this manuscript.

BMJ Open is an open access journal and the full, final, typeset and author-corrected version of record of the manuscript is available on our site with no access controls, subscription charges or pay-per-view fees (<http://bmjopen.bmj.com>).

If you have any questions on BMJ Open's open peer review process please email [info.bmjopen@bmj.com](mailto:info.bmjopen@bmj.com)

# BMJ Open

## **Autologous adipose-derived mesenchymal stem cells combined with hyaluronic acid hydrogel in the treatment of discogenic low back pain: study protocol for a phase II randomized controlled trial**

|                               |                                                                                                                                                                                                                                                                                                                                                                                               |
|-------------------------------|-----------------------------------------------------------------------------------------------------------------------------------------------------------------------------------------------------------------------------------------------------------------------------------------------------------------------------------------------------------------------------------------------|
| Journal:                      | <i>BMJ Open</i>                                                                                                                                                                                                                                                                                                                                                                               |
| Manuscript ID                 | bmjopen-2022-063925                                                                                                                                                                                                                                                                                                                                                                           |
| Article Type:                 | Protocol                                                                                                                                                                                                                                                                                                                                                                                      |
| Date Submitted by the Author: | 18-Apr-2022                                                                                                                                                                                                                                                                                                                                                                                   |
| Complete List of Authors:     | Zhang, Jing; First Affiliated Hospital of Dalian Medical University<br>Sun, Tianze; First Affiliated Hospital of Dalian Medical University<br>Zhang, Wentao; First Affiliated Hospital of Dalian Medical University<br>Yang, Ming; First Affiliated Hospital of Dalian Medical University<br>Li, Zhonghai; First Affiliated Hospital of Dalian Medical University, Department of Orthopaedics |
| Keywords:                     | Protocols & guidelines < HEALTH SERVICES ADMINISTRATION & MANAGEMENT, Back pain < ORTHOPAEDIC & TRAUMA SURGERY, Spine < ORTHOPAEDIC & TRAUMA SURGERY                                                                                                                                                                                                                                          |
|                               |                                                                                                                                                                                                                                                                                                                                                                                               |

SCHOLARONE™  
Manuscripts

1  
2  
3  
4 **Autologous adipose-derived mesenchymal stem cells**  
5  
6 **combined with hyaluronic acid hydrogel in the treatment of**  
7  
8 **discogenic low back pain: a study protocol for a phase II**  
9  
10 **randomized controlled trial**  
11  
12  
13  
14  
15  
16

17 Jing Zhang<sup>1</sup>, Tianze Sun<sup>1</sup>, Wentao Zhang<sup>1</sup>, Ming Yang<sup>1</sup>, Zhonghai Li<sup>1,2\*</sup>  
18  
19  
20

21 1 Department of Orthopedics, First Affiliated Hospital of Dalian Medical University, Dalian,  
22 the People's Republic of China  
23

24 2 Key Laboratory of Molecular Mechanism for Repair and Remodeling of Orthopedic  
25 Diseases, Liaoning Province, the People's Republic of China  
26  
27  
28  
29

30 \* Corresponding Author: Zhonghai Li MD  
31  
32

33 Tel: 86-18098876419 Fax: 86-411-83635963 E-mail: lizhonghaispine@126.com  
34  
35  
36  
37  
38  
39  
40  
41  
42  
43  
44  
45  
46  
47  
48  
49  
50  
51  
52  
53  
54  
55  
56  
57  
58  
59  
60

## ABSTRACT

**Introduction:** Discogenic low back pain (DLBP) is a common disease, and its occurrence is closely related to intervertebral disc degeneration (IDD). At present, none of the traditional treatment methods can repair the degenerated intervertebral disc (IVD). The emergence of stem cell therapy makes it possible to repair and regenerate IVDs tissue, among which adipose-derived mesenchymal stem cells (AD-MSCs) transplantation therapy has become a hot spot of current research. Therefore, this trial aimed to investigate the safety and efficacy of using autologous AD-MSCs combined with hyaluronic acid (HA) hydrogel in the treatment of DLBP.

**Methods and analysis:** This study is a randomized, dose-escalation, placebo-controlled, double-blind, single-center, Phase II clinical trial to evaluate the efficacy and safety of autologous AD-MSCs combined with HA hydrogel in the treatment of patients with DLBP. The 100 eligible patients will be randomly divided into 3 experimental groups with different doses and 1 placebo control group in a ratio of 1:1:1:1. All patients will undergo liposuction to obtain ADMSCs, followed by autologous AD-MSCs mixtures or placebo transplantation after three weeks. The patients will be followed up to 24 months after the transplant. The primary endpoint of this trial is the visual analogue scale (VAS). Secondary endpoints include Oswestry disability index (ODI), Japanese orthopaedic association (JOA) scores, the Mos 36-item short form (SF-36), the Modic classification, Pfirrmann grade, height and segment range of motion of the IVD, vital signs (temperature, pulse, respiration, blood pressure), blood routine, liver and kidney function, immunological examination, urinalysis, and treatment emergent adverse events.

**Ethics and dissemination:** The study protocol has been approved by the Ethics Committee of the First Affiliated Hospital of Dalian Medical University and registered in Chinese Clinical Trial Registry. Dissemination of the results will be presented at a conference and in peer-reviewed publications.

**Trial registration:** ChiCTR2200058291

## KEYWORDS

Protocols & guidelines; Back pain; Spine

### Strengths and limitations of this study

- ▶ This study is a randomized, placebo-controlled, double-blind trial, so bias will be minimized.
- ▶ The results of this study are expected to determine the optimal therapeutic dose for transplantation of AD-MSCs into the degenerative IVD by dose-escalation.
- ▶ The subjects of this trial are recruited from only one research center, and the sample size is not large enough.
- ▶ The subjects of this trial are patients with DLBP with single disc segment degeneration, which would limit applicability to the general population.

## INTRODUCTION

Low back pain (LBP) is a common health concern worldwide. According to some studies, the point prevalence of LBP is 11.9%, and the one-month prevalence is 23.3%, which is the main reason for years lived with disability counts and puts a heavy economic burden on patients and society<sup>1-3</sup>. Discogenic low back pain (DLBP) is a common source of LBP, with an overall prevalence of 26%~42%, and in the younger population, this rate reaches more than 80%<sup>4,5</sup>. DLBP gradually evolves from internal intervertebral disc (IVD) diseases such as inflammation, deformation and annulus fibrosus (AF) injury, and its key pathological process is IVD degeneration (IDD)<sup>6,7</sup>. The clinical manifestations of patients with DLBP are recurrent LBP, especially when sitting for a long time, bending over or coughing, but there is often no positive feature of nerve root damage during physical examination. Although the pathological mechanism of DLBP has not been fully understood, it is widely believed that the sensory nerve fibers from the outer layer of the IVD grow into the interior through the fissure, and the production of proinflammatory cytokines in the degenerated IVD

1  
2  
3  
4 increases, resulting in back pain in patients<sup>8-10</sup>. In addition, abnormal lumbar disc  
5 activity due to long-term mechanical injury may accelerate the progression of  
6 DLBP<sup>11,12</sup>. The diagnosis of DLBP requires a combination of imaging findings and  
7 long-term recurrent LBP. Clinically, magnetic resonance imaging (MRI) is an essential  
8 tool for evaluating intervertebral disc pathology, and its signal characteristics reflect  
9 the degree of IVD aging or degeneration<sup>7</sup>. Many patients with DLBP are found to have  
10 decreased signal intensity in the IVD on MRI T2-weighted imaging, which is the so-  
11 called "black" IVD, and the sagittal view shows that the posterior border of the IVD  
12 has a small, round, limited area of high signal intensity<sup>13,14</sup>. However, the relationship  
13 between the degree of disc degeneration on imaging and the severity of pain remains  
14 unclear, so it is necessary to rely on CT-guided discography for further diagnosis.  
15 Discography is currently the only "gold standard" test for diagnosing DLBP. Following  
16 injection of the contrast agent into the disc, patients will experience similar pain  
17 responses, but the adjacent disc will not<sup>14</sup>. Based on discography, DLBP may be  
18 categorized as AF ruptured LBP and CEPs ruptured LBP, and this classification method  
19 has clinical and theoretical support<sup>15</sup>. Due to the varying severity of clinical  
20 manifestations in patients with DBLP, step-by-step therapy is often used in the  
21 treatment. Traditional treatment methods include conservative, interventional, and  
22 surgical treatments<sup>15</sup>. Most patients tend to opt for conservative treatments due to mild  
23 symptoms and a short course of the disease, including bed rest, physiotherapy with  
24 microwave or infrared, oral painkillers, and functional exercises. Interventional  
25 treatments, such as epidural injections and percutaneous intradiscal therapies, are  
26 generally performed if conservative treatments fail<sup>16-18</sup>. With severe symptoms or  
27 ineffective conservative and interventional treatments, surgical treatments are often  
28 recommended. The most commonly used surgical procedures are interbody fusion and  
29 artificial disc replacement<sup>18</sup>. However, conservative treatments have limited efficacy,  
30 and interventional treatments for pain relief should be further evaluated. Although  
31 surgical treatments can effectively relieve pain, they may cause complications such as  
32 infection, nerve damage, large blood vessel damage and adjacent segment degeneration  
33 due to improper operation or care, which will further damage the body of patients<sup>19,20</sup>.

1  
2  
3  
4 Additionally, the best way to treat DLBP would be to slow down or even reverse the  
5 process of IDD, but neither conservative treatments, interventional treatments nor  
6 surgical treatments can do anything about it. Traditional treatments are in a dilemma,  
7 and a new treatment is urgently needed to induce repair of degenerated disc tissue.  
8  
9

10  
11 The IVD is composed of an outer AF, a nucleus pulposus (NP) in the middle, and  
12 cartilage endplates (CEPs) at the upper and lower ends. NP is the main structure of  
13 IVD, which is mainly composed of NP cells and extracellular matrix (ECM). NP cells  
14 are cartilage-like cells. The main components of ECM are COL II, proteoglycans and  
15 other matrix proteins<sup>21</sup>. IDD mainly occurs in NP. With the degradation of ECM and  
16 the loss of proteoglycans, these changes will reduce the structural integrity of IVD and  
17 eventually damage its function<sup>22</sup>. The recent deepening of the understanding of IDD  
18 has promoted the research of biological therapy, among which stem cell therapy stands  
19 out and becomes the current research hotspot. In the past few decades, human stem cell  
20 therapy indications have involved many different fields, including neurological  
21 diseases, cardiovascular diseases, diabetes, blood diseases and cancer, with exciting  
22 results<sup>23-26</sup>. Given the broad application prospects of stem cell therapy in regenerative  
23 medicine, people have begun to explore the application in spinal degenerative diseases.  
24 DLBP is a common spinal degenerative disease, and the key to its treatment is to repair  
25 the degenerated disc tissue and reduce the discomfort of patients. The transplanted stem  
26 cells are capable of self-replication, renewal, and multi-directional differentiation,  
27 which can differentiate into chondrocytes to replace the lost NP cells, as well as  
28 promoting the formation of ECM by co-culturing with NP cells<sup>27-29</sup>. In addition, stem  
29 cells have immunomodulatory effects and can secrete various cytokines to improve the  
30 microenvironment inside the IVD, promote the repair of degenerated IVD tissue, and  
31 relieve the pain of patients<sup>27-29</sup>. Stem cells for the treatment of IDD come from a wide  
32 range of sources, including bone marrow mesenchymal stem cells (BM-MSCs) and  
33 adipose-derived MSCs (AD-MSCs), and a few stem cell types derived from human  
34 umbilical cord MSCs (HUC-MSCs), pluripotent stem cells (PSCs), NP-derived stem  
35 cells (NPSCs) and other sources<sup>29,30</sup>. Among the many types of stem cells, BM-MSCs  
36 are currently the most studied, and their safety and efficacy in the treatment of IDD  
37  
38  
39  
40  
41  
42  
43  
44  
45  
46  
47  
48  
49  
50  
51  
52  
53  
54  
55  
56  
57  
58  
59  
60

1  
2  
3  
4 have been verified in clinical trials, bringing the dawn of stem cell clinical treatment  
5 for IDD<sup>31,32</sup>. However, due to the cumbersome and invasive process of obtaining BM-  
6 MSCs, its clinical application is limited to a certain extent<sup>33,34</sup>. With the deepening of  
7 research, it has been found that AD-MSCs have similar chondrogenic differentiation  
8 potential compared with BM-MSCs. More importantly, AD-MSCs have the advantages  
9 of easy to obtain in large quantities, lower incidence of donor site and higher  
10 proliferation potential, so they may be an ideal source of stem cells for the treatment of  
11 DLBP<sup>33,35</sup>.

12  
13  
14  
15  
16  
17  
18  
19 During stem cell therapy, potential complications such as leakage and osteophyte  
20 formation may occur at the infusion site, and the implanted stem cells are subject to  
21 high mechanical loads in the disc, which may reduce the viability or function of the  
22 stem cells, resulting in affect the treatment effect. In order to solve these problems,  
23 various scaffolds have been designed as carriers for delivering stem cells, among which  
24 hydrogel scaffolds are more commonly used<sup>36-38</sup>. Among various biomaterials for the  
25 production of hydrogel scaffolds, HA and its derivatives have been extensively studied.  
26 HA is a naturally occurring glycosaminoglycan that is involved in vital processes such  
27 as cell proliferation, migration, angiogenesis, and tissue growth. Biocompatibility,  
28 biodegradability, processability, and tunable mechanical properties of HA contribute to  
29 its clinical appeal<sup>39-41</sup>. Therefore, the transplantation of AD-MSCs combined with HA  
30 hydrogel has become a hot research topic.

31  
32  
33  
34  
35  
36  
37  
38  
39  
40  
41  
42  
43 The efficacy of AD-MSCs in the treatment of DLBP has been verified in animal  
44 models<sup>42-44</sup>. In order to further verify whether stem cell therapy is also safe and effective  
45 in humans, it is necessary to conduct clinical trials. Currently, five clinical trials of AD-  
46 MSCs in the treatment of IDD are registered on the ClinicalTrials.gov website, and  
47 three of them (NCT01643681, NCT03461458, NCT05011474) have not published their  
48 results for various reasons. One of the remaining two clinical trials (NCT02097862)  
49 evaluated the safety and efficacy of intradiscal injection of stromal vascular fraction  
50 (SVF) in combination with platelet rich plasma (PRP) in patients with degenerative disc  
51 disease<sup>45</sup>. There are AD-MSCs and growth factors in the SVF, but the adipocyte  
52 population has been depleted. Another phase I clinical trial (NCT02338271)



demonstrated the safety and tolerability of AD-MSCs combined with HA hydrogel therapy<sup>46</sup>. Although the data from these clinical trials preliminarily demonstrated the safety of autologous AD-MSCs in the treatment of DLBP, there are many shortcomings in these clinical trials, such as the limited number of samples, the lack of appropriate controls, and the lack of blinding. In order to further clarify the efficacy and safety of autologous AD-MSCs combined with HA hydrogel therapy, a large-sample phase II trial with matched controls is required. Based on previous promising findings, we design a double-blind, randomized controlled phase II clinical trial to evaluate the efficacy and safety of percutaneous intradiscal injection of autologous AD-MSCs combined with HA hydrogel scaffold in patients with DLBP.

## **METHODS AND ANALYSIS**

### **Study design**

This study is a randomized, dose-escalation, placebo-controlled, double-blind, single-center, Phase II clinical trial to evaluate the efficacy and safety of autologous AD-MSCs combined with HA hydrogel in the treatment of patients with DLBP. This trial will be conducted at the First Affiliated Hospital of Dalian Medical University in Dalian, Liaoning Province, China, and is expected to enroll 100 patients. After informed consent, patients will undergo relevant examinations, and only eligible patients can participate in clinical trials. All eligible subjects will undergo liposuction to obtain autologous ADMSCs, and then the ADMSCs and HA hydrogels will be formulated into different doses of stem cell mixtures. In the third week after liposuction, subjects will receive either different doses of stem cell mixtures or a placebo transplant, followed by a 24-month follow-up. The trial was registered in Chinese Clinical Trials Registry (<http://www.chictr.org.cn>) on April 4th, 2022 (Registration number ChiCTR2200058291). The detailed trial flow is described in figure 1.

### **Study objectives**

There are two specific objectives of this Phase II clinical trial:

1. To evaluate the efficacy and safety of percutaneous intradiscal injections of ADMSCs combined with HA hydrogel in the treatment of patients with DLBP.
2. To determine the optimal therapeutic dose of ADMSCs.

### Simple size and calculation

As a previous study indicated that after transplantation of 18 million allogeneic BM- MSCs, the mean visual analogue scale (VAS) score of IDD patients was reduced to  $37.63 \pm 10.27$  (10.3 reduction) after 24 months<sup>47</sup>, we set this indicator at 10.6 reduction after 24 months of transplantation treatment. Furthermore, we assumed that  $\alpha$  was 0.05,  $\beta$  was 0.1, and the dropout rate was 20%. Therefore, the calculated sample size for each group was 25, and the total sample size was 100 patients.

### Eligibility Criteria

Patients with low back pain who obtained informed consent will only be allowed to participate in this clinical trial if they meet all the inclusion criteria and none of the exclusion criteria. The inclusion criteria is shown in Table 1, and the exclusion criteria is shown in Table 2.

**Table 1.** Inclusion criteria

| Inclusion criteria                                                                                                                                                                                                                                                                                                                                      |
|---------------------------------------------------------------------------------------------------------------------------------------------------------------------------------------------------------------------------------------------------------------------------------------------------------------------------------------------------------|
| 1. Patients who are male or female and whose age must be 18 years old or older.                                                                                                                                                                                                                                                                         |
| 2. Chronic LBP is accompanied by more than two (including two) clinical manifestations: increased pain when abdominal pressure increases such as cough and sneezing, increased pain when sedentary, forward bending or lifting heavy objects, difficult to relieve or unable to maintain the same posture, and pain relief when lying flat and resting. |
| 3. Patients with LBP lasting 3 months or longer after conservative treatment.                                                                                                                                                                                                                                                                           |
| 4. $VAS \geq 4$ .                                                                                                                                                                                                                                                                                                                                       |
| 5. $ODI \geq 30\%$ .                                                                                                                                                                                                                                                                                                                                    |
| 6. MRI shows that the CEPs of the lumbar IVD is Modic type I or II.                                                                                                                                                                                                                                                                                     |
| 7. MRI shows that the L4-5 IVD is Pfirrmann grade 3, 4 or 5.                                                                                                                                                                                                                                                                                            |
| 8. Discography of lumbar IVD(s) identified as degenerated by MRI show(s) that the patients have only one disc of L4-5 level with similar pain as usual.                                                                                                                                                                                                 |
| 9. Patients with $\geq 20\%$ loss of lumbar disc height compared to normal adjacent discs based on X-ray assessment                                                                                                                                                                                                                                     |
| 10. Patients with no active infection (such as HBsAg, HIV, CMV and rubella virus).                                                                                                                                                                                                                                                                      |

LBP: Low back pain; VAS: Visual analog scale; ODI: Oswestry disability index; MRI: Magnetic resonance imaging; CEPs: Cartilage endplates; IVD: intervertebral disc; HBsAg: Hepatitis B surface antigen; HIV: Human immunodeficiency virus; CMV: Cytomegalovirus.

**Table 2.** Exclusion criteria**Exclusion criteria**

1. Patients with spondylitis or vertebral fractures.
2. Surgery is required for patients with severe lumbar spinal stenosis or prolapse of the lumbar NP resulting in severe nerve compression and pain in the lower limbs.
3. Patients who have received any intradiscal injection procedure (eg, injection of corticosteroids, methylene blue, dextrose, or glucosamine and chondroitin sulfate) within the three months prior to receiving transplantation therapy.
4. Dynamic X-ray examination of the lumbar spine shows that the adjacent vertebral body slips > 3 mm or is angled > 15°.
5. Patients with severe osteoporosis with a BMD T value of -2.5 or lower on DEXA.
6. Pregnant or lactating women, or women who become pregnant within 24 months after receiving intervention.
7. Patients with mental illness or drug addictions or alcohol addictions or those incapable of understanding the purpose or methods of the study.
8. Patients with a history of various systemic diseases such as cancer, autoimmune disease, blood diseases, kidney diseases, or liver diseases.
9. Patients who are allergic to HA, contrast agents, or local anesthetics (eg, lidocaine, bupivacaine).
10. Patients who have previously used any other cell product and/or plan to participate in any other stem cell clinical trial during the 2-year follow-up period

NP: Nucleus pulposus; BMD: bone mineral density; DEXA: Dual-energy X-ray absorptiometry; HA: Hyaluronic acid.

**AD-MSCs preparation and culture**

All eligible patients have 150 ml of subcutaneous adipose tissue harvested by clinicians in the operating room through liposuction under local anesthesia 3 weeks before transplantation, and the patients are discharged after a 4-hour observation period. The harvested adipose tissue will be shipped to the cell factory. AD-MSCs will be obtained by washing, enzymatically dissociating, and centrifuging the adipose tissue using strict aseptic techniques. The cells will be plated on flasks and cultured at 37 °C in a humidified incubator under a 5% CO<sub>2</sub> atmosphere. AD-MSCs used in this clinical trial will be obtained from cultured third-generation cells. These cells surface markers are positive for CD44, CD73, CD29 and negative for CD45 by flow cytometry, and the final products are tested to rule out the growth of aerobes, anaerobic bacteria and mycoplasma. In addition, cytogenetic analysis will be performed to rule out abnormal karyotypes. The cells are suspended at a concentration of 20 × 10<sup>6</sup> cells/ml of normal saline/vial, and these suspensions are transported to the operating room of the institute in a cold box at approximately 4 °C.

### **Preparation of HA hydrogel for cell delivery**

The HA hydrogel scaffold chosen for this clinical trial is Tissefill, a transparent elastic gel composed of non-animal-derived HA derivatives. Cross-linked with butanediol diglycidyl ether, the gel resorbs nearly entirely in the body through enzymatic reactions. This HA hydrogel has been approved by South Korea's Ministry of Food and Drug Safety as a material for the delivery of cells and filling of tissue defects. Tissuefill is purchased from CHA Meditech Co., Ltd and is used to study the efficacy and safety of using autologous AD-MSCs combined with HA hydrogel in the treatment of DLBP. In a previous study, the optimal concentration of Tissuefill for injection into degenerated discs was determined and there was no cytotoxicity observed in the MSCs<sup>48</sup>. Therefore, in this clinical trial, we chose to use Tissuefill at a concentration of 1%.

### **Transplantation of AD-MSCs in combination with HA hydrogel**

Based on discographic findings and confirmation of IDD with T2-weighted MRI, symptomatic discs are selected for transplantation. Under C-arm fluoroscopy, clinicians used spinal needles to percutaneously implant different doses of AD-MSCs with HA hydrogel (1% Tissefill) or saline into the IVD center via a standard posterolateral approach. The needle diameter of the spinal needle is 22G. After the transplantation, the patients take painkillers as needed for 3 days and restricted physical activity for 2 weeks.

### **Randomization and blinding**

All the selected subjects are randomly assigned into the group according to the ratio of 1:1:1:1, and the statistician uses R software to generate a random sequence, a total of 4 groups with 25 cases in each group. In this experiment, the random envelope method is used for grouping concealment. Subjects who meet the eligibility criteria are assigned random numbers (001-100) in the order of enrollment, and then open the random envelopes with the corresponding numbers to obtain the corresponding grouping information.

This trial adopts a double-blind design. The drugs in the control group and the drugs

1  
2  
3  
4 in the experimental groups are completely identical in appearance. During the  
5 transplantation treatment, both the patients and the clinicians performing the  
6 transplantation will be blinded. A statistician generates random numbers and  
7 corresponding drug codes, and then distributes and packs the drugs according to the  
8 codes, and prepares corresponding emergency letters. The computer program that  
9 generates the random numbers and the drug codes are kept as a blind bottom. Blind  
10 bases are in duplicate and kept in the trial responsible unit and agency respectively. A  
11 two-level blind design was adopted, the first level was the group corresponding to each  
12 case number, and the second level was the treatment corresponding to each group. The  
13 pharmacist dispenses the test drug and the placebo into a small sachet according to a  
14 single infusion dose. The sachets have the same shape and are opaque, and are marked  
15 with the serial number corresponding to the intervention category determined by the  
16 random number. Allocation tables recording serial numbers, random numbers, and  
17 group markers are kept in triplicate by the trial designer, the pharmaceutical company,  
18 and the pharmacy, respectively. Neither the trial designer nor the pharmacist participate  
19 in the trial.  
20  
21  
22  
23  
24  
25  
26  
27  
28  
29  
30  
31  
32  
33  
34  
35  
36

### 37 **Intervention**

38 During the third week after liposuction, the subjects receive different doses of stem cell  
39 mixtures or placebos transplant. Subjects in the high-dose group receive a mixture that  
40 includes 1 ml of stem cell suspension ( $20 \times 10^6$  cells/disc), and 1 ml of Tissuefill (1%);  
41 Subjects in the mid-dose group receive a mixture that includes 0.5 ml of stem cell  
42 suspension ( $10 \times 10^6$  cells/disc), 0.5 ml of normal saline, and 1 ml of Tissuefill (1%);  
43 Subjects in the low-dose group receive a mixture that includes 0.25 ml of stem cell  
44 suspension ( $5 \times 10^6$  cells/disc), 0.75 ml of normal saline and 1 ml of Tissuefill (1%);  
45 Subjects in the control group receives 2 ml of normal saline injection. Because an earlier  
46 randomized controlled trial found no significant difference in the treatment of DLBP  
47 with HA alone and saline alone, a single HA solution control group is not necessary for  
48 this trial<sup>47</sup>. During the transplant process, neither the subjects nor the clinicians know  
49 the specific transplant treatment drug and doses.  
50  
51  
52  
53  
54  
55  
56  
57  
58  
59  
60

## Outcome evaluation

The primary endpoint of this trial is improvement in visual analogue scale (VAS) from baseline (prior to the transplantation) at each follow-up time point. Secondary endpoints include Oswestry disability index (ODI), Japanese orthopaedic association (JOA) scores, the Mos 36-item short form (SF-36), the Modic classification, Pfirrmann grade, height and segment range of motion of the IVD, vital signs (temperature, pulse, respiration, blood pressure), blood routine, liver and kidney function, immunological examination, urinalysis, and treatment emergent adverse events. The corresponding outcome measures and their time frames are listed in Table 3.

**Table 3.** Outcome measures and time frames

| Outcome measures   |                                                              | Time frames                                        |
|--------------------|--------------------------------------------------------------|----------------------------------------------------|
| Primary measures   | outcome VAS score                                            | At baseline, 1 week, 1, 3, 6, 12, 18 and 24 months |
| Secondary measures | outcome ODI score                                            | At baseline, 1 week, 1, 3, 6, 12, 18 and 24 months |
|                    | JOA scores system                                            | At baseline, 1 week, 1, 3, 6, 12, 18 and 24 months |
|                    | SF-36 health survey score                                    | At baseline, 6, 12, 24 months                      |
|                    | The Modic changes of the IVD                                 | At baseline, 6, 12, 24 months                      |
|                    | The Pfirrmann grade of the IVD                               | At baseline, 6, 12, 24 months                      |
|                    | Disc height                                                  | At baseline, 6, 12, 24 months                      |
|                    | Segment range of motion                                      | At baseline, 6, 12, 24 months                      |
|                    | Vital signs: temperature, pulse, respiration, blood pressure | At 1 week, 1, 3, 6, 12, 18 and 24 months           |
|                    | Blood routine                                                | At 1 week, 1, 3, 6, 12, 18 and 24 months           |
|                    | Liver and kidney function                                    | At 1 week, 1, 3, 6, 12, 18 and 24 months           |
|                    | Immunological examination                                    | At 1 week, 1, 3, 6, 12, 18 and 24 months           |
|                    | Urinalysis                                                   | At 1 week, 1, 3, 6, 12, 18 and 24 months           |
|                    | Treatment emergent adverse event                             | At 1 week, 1, 3, 6, 12, 18 and 24 months           |

VAS: Visual analogue scale; ODI: Oswestry disability index; JOA: Japanese orthopaedic association; SF-36: the Mos 36-item short form; IVD: intervertebral disc.

## Withdrawal

Discontinuation can occur as a result of death, serious adverse events (SAEs), other serious diseases limiting participation, or withdrawal by the subject requesting the study to be stopped. Those subjects who withdraw from the trial will have their withdrawal reasons and all observations recorded. New participants will not be recruited to replace withdrawn participants.

### **Adverse events**

Adverse events (AEs) are defined as adverse medical events that occur after the patient signs informed consent until completion of the follow-up period. AEs include abnormal laboratory results, symptoms, or diseases. If the AE is confirmed to be a certain drug adverse reaction, it will be reported according to the adverse reaction reporting procedure of the research center. Once an AE occurs, the clinician will conduct necessary treatment according to the patient's condition and decide whether to suspend the clinical study. In terms of SAEs, clinicians should treat it as an emergency and will follow the principle of priority treatment. The researcher will report to the head of the center and the ethics committee of the research unit within 12 hours of the first learning, and report to the team leader within 24 hours or no later than the second working day. At the same time, researchers must handle the communication and aftermath of the subjects and their families.

### **Data collection**

The data generated during the trial will be recorded in the original medical record and the case report form (CRF). To ensure that the data are entered accurately into the CRF, quality control personnel check the consistency of the CRF data with the original record. There are eight data collection points: baseline, 1 week, 1 month, 3 months, 6 months, 12 months, 18 months and 24 months. Research records will be submitted within 3 days of the completion of the data collection to the research leader for review and all data will be submitted within 10 days to the project leader. Next, the auditor will examine each original research record to ensure that the clinical trial data records are accurate, precise, and standardized. Data checks and entries will then be disposed of by the statistical data manager and analyzed by the statisticians.

### **Patient and public involvement**

The patients and public were not involved in the design, or conduct, or reporting or dissemination plans of our research.



### Statistical analysis

Statistical analysis will be performed using SPSS 22.0 software. All statistical tests are two-sided, the test level is  $\alpha=0.05$ , and the confidence interval is 95% confidence level. The primary focus of the data analysis is to determine the effect of any treatment at each follow-up point (1 week and 1, 3, 6, 12, 18, and 24 months post-transplant). In addition, linear mixed models are applied to assess differences in treatment effect between groups at each follow-up point. In addition, linear mixed models are applied to assess differences in treatment effect between groups ( $20 \times 10^6$  cells/disc,  $10 \times 10^6$  cells/disc, and  $5 \times 10^6$  cells/disc) at each follow-up point. According to the type of variables and data distribution,  $t$  test, analysis of variance or nonparametric test is used for measurement data, and  $\chi^2$  test is used for enumeration data. The safety evaluation is mainly based on descriptive statistical analysis, listing adverse events, serious adverse events, the number of times leading to adverse events, and calculating the incidence.

### DISCUSSION

This Phase II clinical trial will answer two key questions for patients and the scientific community. First, whether autologous AD-MSCs combined with HA hydrogel is safe and effective in the treatment of DLBP. Second, what is the optimal dose of AD-MSCs for the treatment of DLBP. Although many studies have been conducted on BM-MSCs, and the results of phase III clinical trials have also demonstrated their efficacy, the invasiveness of obtaining BM-MSCs makes many patients hesitant. The emergence of AD-MSCs perfectly fills this gap and makes stem cell therapy more acceptable to patients, which will greatly promote stem cell therapy to the clinic. However, stem cell therapy also faces challenges. First of all, in vitro studies have shown that the harsh microenvironment inside the degenerated IVD will affect the biological behaviors of stem cells, such as viability, proliferation and differentiation, and then affect the therapeutic effect of stem cell therapy<sup>49,50</sup>. Secondly, the clinical research on AD-MSCs is still in a relatively immature stage, and the specific therapeutic mechanism of stem



1  
2  
3  
4 cells is still lacking in-depth understanding. Therefore, it is necessary for us to carry  
5  
6 out more clinical trials to further explore. Although there are relatively few clinical  
7  
8 trials for DLBP treatment, AD-MSCs are still a promising type of MSCs. The  
9  
10 successful implementation of this clinical trial will provide data support for subsequent  
11  
12 phase III clinical trials, and will also significantly promote the clinical application of  
13  
14 AD-MSCs. DLBP patients are about to usher in a new era of ADMSCs therapy.  
15  
16  
17  
18

19 **Author Contributions** ZHL contributed to the conception and design of the study. JZ  
20 wrote the first draft of the manuscript. WTZ, TZS, and MY supervised the manuscript.  
21 All authors contributed to manuscript revision and approved the submitted version.  
22  
23  
24

25 **Funding** This study was supported by the open project of Key Laboratory for  
26 Micro/Nano Technology and System of Liaoning Province, Dalian University of  
27 Technology (20210101). The funders had no role in the study design, data collection  
28 and analysis, decision to publish, or preparation of the manuscript.  
29  
30

31 **Competing interests** All authors declare to have no competing interest concerning this  
32 work.  
33  
34  
35

36 **Patient and public involvement** Patients and/or the public were not involved in the  
37 design, or conduct, or reporting, or dissemination plans of this research.  
38  
39  
40

41 **Patient consent for publication** Not required.  
42  
43

44 **ETHICS AND DISSEMINATION** The study protocol has been approved by the  
45 Ethics Committee of the First Affiliated Hospital of Dalian Medical University and  
46 registered in Chinese Clinical Trial Registry. Dissemination of the results will be  
47 presented at a conference and in peer-reviewed publications.  
48  
49  
50  
51  
52  
53  
54  
55  
56  
57  
58  
59  
60

## REFERENCES

1. Knezevic NN, Candido KD, Vlaeyen JWS, Van Zundert J, Cohen SP. Low back pain. *Lancet (London, England)*. 2021;398(10294):78-92.
2. Hurwitz EL, Randhawa K, Yu H, Côté P, Haldeman S. The Global Spine Care Initiative: a summary of the global burden of low back and neck pain studies. *European spine journal : official publication of the European Spine Society, the European Spinal Deformity Society, and the European Section of the Cervical Spine Research Society*. 2018;27(Suppl 6):796-801.
3. Hoy D, Bain C, Williams G, et al. A systematic review of the global prevalence of low back pain. *Arthritis and rheumatism*. 2012;64(6):2028-2037.
4. Schneider BJ, Hunt C, Conger A, et al. The effectiveness of intradiscal biologic treatments for discogenic low back pain: a systematic review. *Spine J*. 2022;22(2):226-237.
5. Verrills P, Nowesenitz G, Barnard A. Prevalence and Characteristics of Discogenic Pain in Tertiary Practice: 223 Consecutive Cases Utilizing Lumbar Discography. *Pain medicine (Malden, Mass)*. 2015;16(8):1490-1499.
6. Mosley GE, Evashwick-Rogler TW, Lai A, Iatridis JC. Looking beyond the intervertebral disc: the need for behavioral assays in models of discogenic pain. *Annals of the New York Academy of Sciences*. 2017;1409(1):51-66.
7. Fujii K, Yamazaki M, Kang JD, et al. Discogenic Back Pain: Literature Review of Definition, Diagnosis, and Treatment. *JBMR plus*. 2019;3(5):e10180.
8. Yang G, Liao W, Shen M, Mei H. Insight into neural mechanisms underlying discogenic back pain. *Journal of International Medical Research*. 2018;46(11):4427-4436.
9. Molinos M, Almeida CR, Caldeira J, Cunha C, Gonçalves RM, Barbosa MA. Inflammation in intervertebral disc degeneration and regeneration. *Journal of The Royal Society Interface*. 2015;12(104):20141191.
10. Wang Y, Che M, Xin J, Zheng Z, Li J, Zhang S. The role of IL-1 $\beta$  and TNF- $\alpha$  in intervertebral disc degeneration. *Biomedicine & Pharmacotherapy*. 2020;131:110660.
11. Ohtori S, Miyagi M, Inoue G. Sensory nerve ingrowth, cytokines, and instability of discogenic low back pain: A review. *Spine surgery and related research*. 2018;2(1):11-17.
12. Desmoulin GT, Pradhan V, Milner TE. Mechanical Aspects of Intervertebral Disc Injury and Implications on Biomechanics. *Spine (Phila Pa 1976)*. 2020;45(8):E457-e464.
13. Rahyussalim AJ, Zufar MLL, Kurniawati T. Significance of the Association between Disc Degeneration Changes on Imaging and Low Back Pain: A Review Article. *Asian spine journal*. 2020;14(2):245-257.
14. Wang H, Li Z, Zhang C, et al. Correlation between high-intensity zone on MRI and discography in patients with low back pain. *Medicine*. 2017;96(30):e7222.
15. Peng BG. Pathophysiology, diagnosis, and treatment of discogenic low back pain. *World journal of orthopedics*. 2013;4(2):42-52.
16. Yang S, Boudier-Revéret M, Chang MC. Use of Pulsed Radiofrequency for the Treatment of Discogenic Back Pain: A Narrative Review. *Pain practice : the official journal of World Institute of Pain*. 2021;21(5):594-601.
17. Michalik AJ, Patel RK. Evaluation of transforaminal epidural steroid injections for discogenic axial lumbosacral back pain utilizing PROMIS as an outcome measure. *Spine J*. 2021;21(2):202-211.

- 1
  - 2
  - 3
  - 4
  - 5
  - 6
  - 7
  - 8
  - 9
  - 10
  - 11
  - 12
  - 13
  - 14
  - 15
  - 16
  - 17
  - 18
  - 19
  - 20
  - 21
  - 22
  - 23
  - 24
  - 25
  - 26
  - 27
  - 28
  - 29
  - 30
  - 31
  - 32
  - 33
  - 34
  - 35
  - 36
  - 37
  - 38
  - 39
  - 40
  - 41
  - 42
  - 43
  - 44
  - 45
  - 46
  - 47
  - 48
  - 49
  - 50
  - 51
  - 52
  - 53
  - 54
  - 55
  - 56
  - 57
  - 58
  - 59
  - 60
18. Zhao L, Manchikanti L, Kaye AD, Abd-Elsayed A. Treatment of Discogenic Low Back Pain: Current Treatment Strategies and Future Options-a Literature Review. *Current pain and headache reports*. 2019;23(11):86.
19. Luo L, Zhang C, Zhou Q, et al. Effectiveness of Transpedicular Dynamic Stabilization in Treating Discogenic Low Back Pain. *World neurosurgery*. 2018;111:e192-e198.
20. Vieli M, Staartjes VE, Eversdijk HAJ, De Wispelaere MP, Oosterhuis JWA, Schröder ML. Safety and Efficacy of Anterior Lumbar Interbody Fusion for Discogenic Chronic Low Back Pain in a Short-stay Setting: Data From a Prospective Registry. *Cureus*. 2019;11(8):e5332.
21. Yang S, Zhang F, Ma J, Ding W. Intervertebral disc ageing and degeneration: The antiapoptotic effect of oestrogen. *Ageing research reviews*. 2020;57:100978.
22. Clarke LE, McConnell JC, Sherratt MJ, Derby B, Richardson SM, Hoyland JA. Growth differentiation factor 6 and transforming growth factor-beta differentially mediate mesenchymal stem cell differentiation, composition, and micromechanical properties of nucleus pulposus constructs. *Arthritis Res Ther*. 2014;16(2):R67.
23. Liu XY, Yang LP, Zhao L. Stem cell therapy for Alzheimer's disease. *World J Stem Cells*. 2020;12(8):787-802.
24. Protze SI, Lee JH, Keller GM. Human Pluripotent Stem Cell-Derived Cardiovascular Cells: From Developmental Biology to Therapeutic Applications. *Cell stem cell*. 2019;25(3):311-327.
25. Chen S, Du K, Zou C. Current progress in stem cell therapy for type 1 diabetes mellitus. *Stem Cell Res Ther*. 2020;11(1):275.
26. Dolstra H, Roeven MWH, Spanholtz J, et al. Successful Transfer of Umbilical Cord Blood CD34(+) Hematopoietic Stem and Progenitor-derived NK Cells in Older Acute Myeloid Leukemia Patients. *Clinical cancer research : an official journal of the American Association for Cancer Research*. 2017;23(15):4107-4118.
27. Miguélez-Rivera L, Pérez-Castrillo S, González-Fernández ML, et al. Immunomodulation of mesenchymal stem cells in discogenic pain. *Spine J*. 2018;18(2):330-342.
28. Richardson SM, Kalamegam G, Pushparaj PN, et al. Mesenchymal stem cells in regenerative medicine: Focus on articular cartilage and intervertebral disc regeneration. *Methods (San Diego, Calif)*. 2016;99:69-80.
29. Zhang W, Sun T, Li Y, et al. Application of stem cells in the repair of intervertebral disc degeneration. *Stem Cell Res Ther*. 2022;13(1):70.
30. Liu Y, Liu H, Meng Y, Zhang L. [Research progress of endogenous repair strategy in intervertebral disc]. *Zhongguo xiu fu chong jian wai ke za zhi = Zhongguo xiufu chongjian waike zazhi = Chinese journal of reparative and reconstructive surgery*. 2021;35(5):636-641.
31. Noriega DC, Ardura F, Hernández-Ramajo R, et al. Intervertebral Disc Repair by Allogeneic Mesenchymal Bone Marrow Cells: A Randomized Controlled Trial. *Transplantation*. 2017;101(8):1945-1951.
32. Noriega DC, Ardura F, Hernández-Ramajo R, et al. Treatment of Degenerative Disc Disease With Allogeneic Mesenchymal Stem Cells: Long-term Follow-up Results. *Transplantation*. 2021;105(2):e25-e27.
33. Li X, Wang M, Jing X, et al. Bone Marrow- and Adipose Tissue-Derived Mesenchymal Stem Cells: Characterization, Differentiation, and Applications in Cartilage Tissue Engineering. *Critical reviews in eukaryotic gene expression*. 2018;28(4):285-310.
34. Grad S, Alini M, Eglin D, et al. Cells and Biomaterials for Intervertebral Disc Regeneration.

- 1  
2  
3  
4  
5  
6  
7  
8  
9  
10  
11  
12  
13  
14  
15  
16  
17  
18  
19  
20  
21  
22  
23  
24  
25  
26  
27  
28  
29  
30  
31  
32  
33  
34  
35  
36  
37  
38  
39  
40  
41  
42  
43  
44  
45  
46  
47  
48  
49  
50  
51  
52  
53  
54  
55  
56  
57  
58  
59  
60
- Synthesis Lectures on Tissue Engineering*. 2010;2(1):1-104.
35. Wankhade UD, Shen M, Kolhe R, Fulzele S. Advances in Adipose-Derived Stem Cells Isolation, Characterization, and Application in Regenerative Tissue Engineering. *Stem Cells Int*. 2016;2016:3206807.
36. Huang Q, Zou Y, Arno MC, et al. Hydrogel scaffolds for differentiation of adipose-derived stem cells. *Chemical Society reviews*. 2017;46(20):6255-6275.
37. Wang Y, Zhang Y, Chen K, et al. Injectable nanostructured colloidal gels resembling native nucleus pulposus as carriers of mesenchymal stem cells for the repair of degenerated intervertebral discs. *Materials science & engineering C, Materials for biological applications*. 2021;128:112343.
38. Zhang C, Gullbrand SE, Schaer TP, et al. Combined Hydrogel and Mesenchymal Stem Cell Therapy for Moderate-Severity Disc Degeneration in Goats. *Tissue engineering Part A*. 2021;27(1-2):117-128.
39. Chen P, Ning L, Qiu P, et al. Photo-crosslinked gelatin-hyaluronic acid methacrylate hydrogel-committed nucleus pulposus-like differentiation of adipose stromal cells for intervertebral disc repair. *J Tissue Eng Regen Med*. 2019;13(4):682-693.
40. Russo F, Ambrosio L, Peroglio M, et al. A Hyaluronan and Platelet-Rich Plasma Hydrogel for Mesenchymal Stem Cell Delivery in the Intervertebral Disc: An Organ Culture Study. *International journal of molecular sciences*. 2021;22(6).
41. Fang Y, Shi L, Duan Z, Rohani S. Hyaluronic acid hydrogels, as a biological macromolecule-based platform for stem cells delivery and their fate control: A review. *Int J Biol Macromol*. 2021;189:554-566.
42. Xiao L, Xu SJ, Liu C, Wang J, Hu B, Xu HG. Sod2 and catalase improve pathological conditions of intervertebral disc degeneration by modifying human adipose-derived mesenchymal stem cells. *Life sciences*. 2021;267:118929.
43. Muttigi MS, Kim BJ, Kumar H, et al. Efficacy of matrilin-3-primed adipose-derived mesenchymal stem cell spheroids in a rabbit model of disc degeneration. *Stem Cell Res Ther*. 2020;11(1):363.
44. Xu H, Sun M, Wang C, et al. Growth differentiation factor-5-gelatin methacryloyl injectable microspheres laden with adipose-derived stem cells for repair of disc degeneration. *Biofabrication*. 2020;13(1):015010.
45. Comella K, Silbert R, Parlo M. Effects of the intradiscal implantation of stromal vascular fraction plus platelet rich plasma in patients with degenerative disc disease. *J Transl Med*. 2017;15(1):12.
46. Kumar H, Ha DH, Lee EJ, et al. Safety and tolerability of intradiscal implantation of combined autologous adipose-derived mesenchymal stem cells and hyaluronic acid in patients with chronic discogenic low back pain: 1-year follow-up of a phase I study. *Stem Cell Res Ther*. 2017;8(1):262.
47. Amirdelfan K, Bae H, McJunkin T, et al. Allogeneic mesenchymal precursor cells treatment for chronic low back pain associated with degenerative disc disease: a prospective randomized, placebo-controlled 36-month study of safety and efficacy. *Spine J*. 2021;21(2):212-230.
48. Ahn J, Park EM, Kim BJ, et al. Transplantation of human Wharton's jelly-derived mesenchymal stem cells highly expressing TGF $\beta$  receptors in a rabbit model of disc degeneration. *Stem Cell Res Ther*. 2015;6:190.
49. Vadalà G, Ambrosio L, Russo F, Papalia R, Denaro V. Interaction between Mesenchymal Stem

1  
2  
3 Cells and Intervertebral Disc Microenvironment: From Cell Therapy to Tissue Engineering.  
4 *Stem Cells International*. 2019;2019:2376172.

- 5  
6 50. Esquijarosa Hechavarria M, Richard SA. Edifying the Focal Factors Influencing Mesenchymal  
7 Stem Cells by the Microenvironment of Intervertebral Disc Degeneration in Low Back Pain.  
8 *Pain Research and Management*. 2022;2022:6235400.  
9

10  
11  
12  
13  
14  
15  
16 **Figure legend**

17  
18 Fig. 1 Study flow diagram  
19  
20  
21  
22  
23  
24  
25  
26  
27  
28  
29  
30  
31  
32  
33  
34  
35  
36  
37  
38  
39  
40  
41  
42  
43  
44  
45  
46  
47  
48  
49  
50  
51  
52  
53  
54  
55  
56  
57  
58  
59  
60

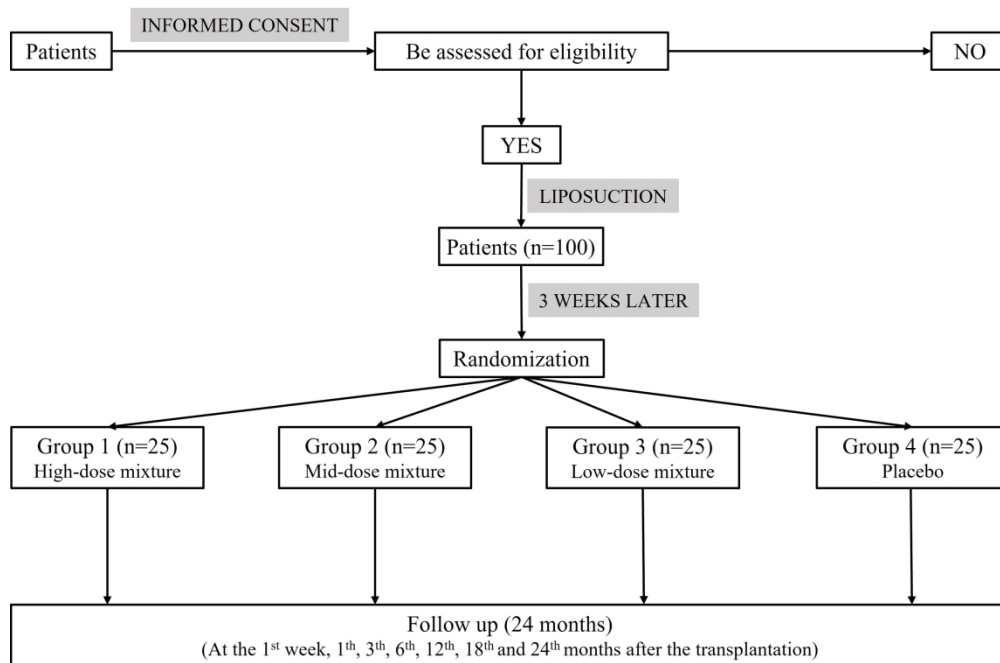

Study flow diagram

252x167mm (300 x 300 DPI)

# BMJ Open

## Autologous cultured adipose derived mesenchymal stem cells combined with hyaluronic acid hydrogel in the treatment of discogenic low back pain: a study protocol for a phase II randomized controlled trial

|                                 |                                                                                                                                                                                                                                                                                                                                                                                               |
|---------------------------------|-----------------------------------------------------------------------------------------------------------------------------------------------------------------------------------------------------------------------------------------------------------------------------------------------------------------------------------------------------------------------------------------------|
| Journal:                        | <i>BMJ Open</i>                                                                                                                                                                                                                                                                                                                                                                               |
| Manuscript ID                   | bmjopen-2022-063925.R1                                                                                                                                                                                                                                                                                                                                                                        |
| Article Type:                   | Protocol                                                                                                                                                                                                                                                                                                                                                                                      |
| Date Submitted by the Author:   | 28-Sep-2022                                                                                                                                                                                                                                                                                                                                                                                   |
| Complete List of Authors:       | Zhang, Jing; First Affiliated Hospital of Dalian Medical University<br>Sun, Tianze; First Affiliated Hospital of Dalian Medical University<br>Zhang, Wentao; First Affiliated Hospital of Dalian Medical University<br>Yang, Ming; First Affiliated Hospital of Dalian Medical University<br>Li, Zhonghai; First Affiliated Hospital of Dalian Medical University, Department of Orthopaedics |
| <b>Primary Subject Heading</b>: | Medical management                                                                                                                                                                                                                                                                                                                                                                            |
| Secondary Subject Heading:      | Evidence based practice                                                                                                                                                                                                                                                                                                                                                                       |
| Keywords:                       | Protocols & guidelines < HEALTH SERVICES ADMINISTRATION & MANAGEMENT, Back pain < ORTHOPAEDIC & TRAUMA SURGERY, Spine < ORTHOPAEDIC & TRAUMA SURGERY                                                                                                                                                                                                                                          |
|                                 |                                                                                                                                                                                                                                                                                                                                                                                               |

SCHOLARONE™  
Manuscripts

1  
2  
3  
4 **Autologous cultured adipose derived mesenchymal stem**  
5  
6 **cells combined with hyaluronic acid hydrogel in the**  
7  
8 **treatment of discogenic low back pain: a study protocol for a**  
9  
10 **phase II randomized controlled trial**  
11  
12  
13  
14  
15  
16

17 Jing Zhang<sup>1</sup>, Tianze Sun<sup>1</sup>, Wentao Zhang<sup>1</sup>, Ming Yang<sup>1</sup>, Zhonghai Li<sup>1,2\*</sup>  
18  
19  
20

21 1 Department of Orthopedics, First Affiliated Hospital of Dalian Medical University, Dalian,  
22 the People's Republic of China  
23

24 2 Key Laboratory of Molecular Mechanism for Repair and Remodeling of Orthopedic  
25 Diseases, Liaoning Province, the People's Republic of China  
26  
27  
28  
29

30 \* Corresponding Author: Zhonghai Li MD  
31  
32

33 Tel: 86-18098876419 Fax: 86-411-83635963 E-mail: lizhonghaispine@126.com  
34  
35  
36  
37  
38  
39  
40  
41  
42  
43  
44  
45  
46  
47  
48  
49  
50  
51  
52  
53  
54  
55  
56  
57  
58  
59  
60



## ABSTRACT

**Introduction:** Discogenic low back pain (DLBP) is a common disease, and its occurrence is closely related to intervertebral disc degeneration (IDD). At present, none of the traditional treatment methods can repair the degenerated intervertebral disc (IVD). The emergence of stem cell therapy makes it possible to repair and regenerate IVDs tissue, among which adipose derived mesenchymal stem cells (ADMSCs) transplantation therapy has become a hot spot of current research. Therefore, this trial aimed to investigate the safety and efficacy of using autologous cultured ADMSCs combined with hyaluronic acid (HA) hydrogel in the treatment of DLBP.

**Methods and analysis:** This study is a randomized, dose-escalation, placebo-controlled, double-blind, single-center, Phase II clinical trial to evaluate the efficacy and safety of autologous cultured ADMSCs combined with HA hydrogel in the treatment of patients with DLBP. The 100 eligible patients will be randomly divided into 3 experimental groups with different doses and 1 placebo control group in a ratio of 1:1:1:1. All patients will undergo liposuction to obtain ADMSCs, followed by autologous cultured ADMSCs mixtures or placebo transplantation after three weeks. The patients will be followed up to 24 months after the transplant. The primary endpoint of this trial is the visual analogue scale (VAS). Secondary endpoints include Oswestry disability index (ODI), Japanese orthopaedic association (JOA) scores, the Mos 36-item short form (SF-36), the Modic classification, Pfirrmann grade, height and segment range of motion of the IVD, vital signs (temperature, pulse, respiration, blood pressure), blood routine, liver and kidney function, immunological examination, urinalysis, and treatment emergent adverse events.

**Ethics and dissemination:** The study protocol has been approved by the Ethics Committee of the First Affiliated Hospital of Dalian Medical University and registered in Chinese Clinical Trial Registry. Dissemination of the results will be presented at a conference and in peer-reviewed publications.

**Trial registration:** ChiCTR2200058291

## KEYWORDS

Protocols & guidelines; Back pain; Spine

### Strengths and limitations of this study

- ▶ This study is a randomized, placebo-controlled, double-blind trial, so bias will be minimized.
- ▶ The subjects of this trial are recruited from only one research center, and the sample size is not large enough.
- ▶ The subjects of this trial are patients with DLBP with single disc segment degeneration, which would limit applicability to the general population.

## INTRODUCTION

Low back pain (LBP) is a common health concern worldwide. According to some studies, the point prevalence of LBP is 11.9%, and the one-month prevalence is 23.3%. LBP is the main reason for years lived with disability and places a heavy burden on patients and society<sup>[1-3]</sup>. Discogenic low back pain (DLBP) is a common source of LBP, with an overall prevalence of 26%~42%, and in the younger population, this rate reaches more than 80%<sup>[4,5]</sup>. DLBP gradually evolves from internal intervertebral disc (IVD) diseases such as inflammation, deformation and annulus fibrosus (AF) injury, and its key pathological process is IVD degeneration (IDD)<sup>[6,7]</sup>. The clinical manifestations of patients with DLBP are recurrent LBP, especially when sitting for a long time, bending over or coughing, but there is often no positive feature of nerve root damage during physical examination. Although the pathological mechanism of DLBP has not been fully understood, it is widely believed that the sensory nerve fibers from the outer layer of the IVD grow into the interior through the fissure, and the production of proinflammatory cytokines in the degenerated IVD increases, resulting in back pain in patients<sup>[8-10]</sup>. In addition, abnormal lumbar disc activity due to long-term mechanical injury may accelerate the progression of DLBP<sup>[11,12]</sup>. The diagnosis of DLBP requires

1  
2  
3  
4 a combination of imaging findings and long-term recurrent LBP. Clinically, magnetic  
5 resonance imaging (MRI) is an essential tool for evaluating IVD pathology, and its  
6 signal characteristics reflect the degree of IVD aging or degeneration<sup>[7]</sup>. Many patients  
7 with DLBP are found to have decreased signal intensity in the IVD on MRI T2-  
8 weighted imaging, which is the so-called "black" IVD, and the sagittal view shows that  
9 the posterior border of the IVD has a small, round, limited area of high signal  
10 intensity<sup>[13,14]</sup>. However, the relationship between the degree of disc degeneration on  
11 imaging and the severity of pain remains unclear, so it is necessary to rely on CT-guided  
12 discography for further diagnosis. Discography is currently the only "gold standard"  
13 test for diagnosing DLBP. Following injection of the contrast agent into the disc,  
14 patients will experience similar pain responses, but the adjacent disc will not<sup>[14]</sup>. Based  
15 on discography, DLBP may be categorized as AF ruptured LBP and cartilage endplates  
16 (CEPs) ruptured LBP, and this classification method has clinical and theoretical  
17 support<sup>[15]</sup>. Due to the varying severity of clinical manifestations in patients with DBLP,  
18 step-by-step therapy is often used in the treatment. Traditional treatment methods  
19 include conservative, interventional, and surgical treatments<sup>[15]</sup>. Most patients tend to  
20 opt for conservative treatments due to mild symptoms and a short course of the disease,  
21 including bed rest, physiotherapy with microwave or infrared, oral painkillers, and  
22 functional exercises. Interventional treatments, such as epidural injections and  
23 percutaneous intradiscal therapies, are generally performed if conservative treatments  
24 fail<sup>[16-18]</sup>. With severe symptoms or ineffective conservative and interventional  
25 treatments, surgical treatments are often recommended. The most commonly used  
26 surgical procedures are interbody fusion and artificial disc replacement<sup>[18]</sup>. However,  
27 conservative treatments have limited efficacy, and interventional treatments for pain  
28 relief should be further evaluated. Although surgical treatments can effectively relieve  
29 pain, they may cause complications such as infection, nerve damage, large blood vessel  
30 damage and adjacent segment degeneration due to improper operation or care, which  
31 will further damage the body of patients<sup>[19,20]</sup>. Additionally, the best way to treat DLBP  
32 would be to slow down or even reverse the process of IDD, but neither conservative  
33 treatments, interventional treatments nor surgical treatments can do anything about it.  
34  
35  
36  
37  
38  
39  
40  
41  
42  
43  
44  
45  
46  
47  
48  
49  
50  
51  
52  
53  
54  
55  
56  
57  
58  
59  
60

1  
2  
3  
4 Traditional treatments are in a dilemma, and a new treatment is urgently needed to  
5 induce repair of degenerated disc tissue.  
6

7 The IVD is composed of an outer AF, a nucleus pulposus (NP) in the middle, and  
8 CEPs at the upper and lower ends. NP is the main structure of IVD, which is mainly  
9 composed of NP cells and extracellular matrix (ECM). NP cells are cartilage-like cells.  
10 The main components of ECM are COL II, proteoglycans and other matrix proteins<sup>[21]</sup>.  
11 IDD mainly occurs in NP. With the degradation of ECM and the loss of proteoglycans,  
12 these changes will reduce the structural integrity of IVD and eventually damage its  
13 function<sup>[22]</sup>. The recent deepening of the understanding of IDD has promoted the  
14 research of biological therapy, among which stem cell therapy stands out and becomes  
15 the current research hotspot. In the past few decades, human stem cell therapy  
16 indications have involved many different fields, including neurological diseases,  
17 cardiovascular diseases, diabetes, blood diseases and cancer, with exciting results<sup>[23-26]</sup>.  
18 Given the broad application prospects of stem cell therapy in regenerative medicine,  
19 people have begun to explore the application in spinal degenerative diseases. DLBP is  
20 a common spinal degenerative disease, and the key to its treatment is to repair the  
21 degenerated disc tissue and reduce the discomfort of patients. The transplanted stem  
22 cells are capable of self-replication, renewal, and multi-directional differentiation,  
23 which can differentiate into chondrocytes to replace the lost NP cells, as well as  
24 promoting the formation of ECM by co-culturing with NP cells<sup>[27-29]</sup>. In addition, stem  
25 cells have immunomodulatory effects and can secrete various cytokines to improve the  
26 microenvironment inside the IVD, promote the repair of degenerated IVD tissue, and  
27 relieve the pain of patients<sup>[27-29]</sup>. Stem cells for the treatment of IDD come from a wide  
28 range of sources, including bone marrow mesenchymal stem cells (BMSCs) and  
29 adipose derived MSCs (ADMSCs), and a few stem cell types derived from human  
30 umbilical cord MSCs (HUCMSCs), pluripotent stem cells (PSCs), NP-derived stem  
31 cells (NPSCs) and other sources<sup>[29,30]</sup>. Among the many types of stem cells, BMSCs are  
32 currently the most studied, and their safety and efficacy in the treatment of IDD have  
33 been verified in clinical trials, bringing the dawn of stem cell clinical treatment for  
34 IDD<sup>[31,32]</sup>. However, due to the cumbersome and invasive process of obtaining BMSCs,  
35  
36  
37  
38  
39  
40  
41  
42  
43  
44  
45  
46  
47  
48  
49  
50  
51  
52  
53  
54  
55  
56  
57  
58  
59  
60

1  
2  
3  
4 its clinical application is limited to a certain extent<sup>[33,34]</sup>. With the deepening of research,  
5  
6 it has been found that ADMSCs have similar chondrogenic differentiation potential  
7  
8 compared with BMSCs. More importantly, ADMSCs have the advantages of easy to  
9  
10 obtain in large quantities, lower incidence of donor site and higher proliferation  
11  
12 potential, so they may be an ideal source of stem cells for the treatment of DLBP<sup>[33,35]</sup>.

13  
14 During stem cell therapy, potential complications such as leakage and osteophyte  
15  
16 formation may occur at the infusion site, and the implanted stem cells are subject to  
17  
18 high mechanical loads in the disc, which may reduce the viability or function of the  
19  
20 stem cells. In order to solve these problems, various scaffolds have been designed as  
21  
22 carriers for delivering stem cells, among which hydrogel scaffolds are more commonly  
23  
24 used<sup>[36-38]</sup>. Among various biomaterials for the production of hydrogel scaffolds, HA  
25  
26 and its derivatives have been extensively studied. HA is a naturally occurring  
27  
28 glycosaminoglycan that is involved in vital processes such as cell proliferation,  
29  
30 migration, angiogenesis, and tissue growth. Biocompatibility, biodegradability,  
31  
32 processability, and tunable mechanical properties of HA contribute to its clinical  
33  
34 appeal<sup>[39-41]</sup>. Therefore, the transplantation of ADMSCs combined with HA hydrogel  
35  
36 has become a hot research topic.

37  
38 The efficacy of ADMSCs in the treatment of DLBP has been verified in animal  
39  
40 models<sup>[42-44]</sup>. In order to further verify whether stem cell therapy is also safe and  
41  
42 effective in humans, it is necessary to conduct clinical trials. Currently, six clinical trials  
43  
44 of ADMSCs in the treatment of IDD are registered on the ClinicalTrials.gov website,  
45  
46 and four of them (NCT01643681, NCT03461458, NCT05011474, NCT02529566)  
47  
48 have not published their results for various reasons. One of the remaining two clinical  
49  
50 trials (NCT02097862) evaluated the safety and efficacy of intradiscal injection of  
51  
52 stromal vascular fraction (SVF) in combination with platelet rich plasma (PRP) in  
53  
54 patients with degenerative disc disease<sup>[45]</sup>. There are ADMSCs and growth factors in  
55  
56 the SVF, but the adipocyte population has been depleted. Another phase I clinical trial  
57  
58 (NCT02338271) demonstrated the safety and tolerability of ADMSCs combined with  
59  
60 HA hydrogel therapy<sup>[46]</sup>.

Safety is an important consideration in conducting clinical trials. Since the IVD

1  
2  
3  
4 contains cartilage tissue, researchers also pay attention to the progress made by  
5  
6  
7  
8  
9  
10  
11  
12  
13  
14  
15  
16  
17  
18  
19  
20  
21  
22  
23  
24  
25  
26  
27  
28  
29  
30  
31  
32  
33  
34  
35  
36  
37  
38  
39  
40  
41  
42  
43  
44  
45  
46  
47  
48  
49  
50  
51  
52  
53  
54  
55  
56  
57  
58  
59  
60  
contains cartilage tissue, researchers also pay attention to the progress made by ADMSCs in treating articular cartilage injuries. The safety of ADMSCs in repairing articular cartilage has been demonstrated in clinical trials conducted in the United States<sup>[47,48]</sup>, China<sup>[49,50]</sup>, South Korea<sup>[51]</sup>, Italy<sup>[52]</sup>, France<sup>[53]</sup> and Australia<sup>[54]</sup>. The progress made by ADMSCs in the treatment of cartilage injury has significantly increased our confidence in their application to the treatment of DLBP.

Although the data from these clinical trials preliminarily demonstrated the safety of autologous cultured ADMSCs in the treatment of DLBP, there are many shortcomings in these clinical trials, such as the limited number of samples, the lack of appropriate controls, and the lack of blinding. In order to further clarify the efficacy and safety of autologous cultured ADMSCs combined with HA hydrogel therapy, a large-sample phase II trial with matched controls is required. Based on previous promising findings, we design a double-blind, randomized controlled phase II clinical trial to evaluate the efficacy and safety of percutaneous intradiscal injection of autologous cultured ADMSCs combined with HA hydrogel scaffold in patients with DLBP.

## **METHODS AND ANALYSIS**

### **Study design**

This study is a randomized, dose-escalation, placebo-controlled, double-blind, single-center, Phase II clinical trial to evaluate the efficacy and safety of autologous cultured ADMSCs combined with HA hydrogel in the treatment of patients with DLBP. This trial will be conducted at the First Affiliated Hospital of Dalian Medical University in Dalian, Liaoning Province, China, and is expected to enroll 100 patients. After informed consent, patients will undergo relevant examinations, and only eligible patients can participate in clinical trials. All eligible subjects will undergo liposuction to obtain autologous cultured ADMSCs, and then the ADMSCs and HA hydrogels will be formulated into different doses of stem cell mixtures. In the third week after liposuction, subjects will receive either different doses of stem cell mixtures or a placebo transplant, followed by a 24-month follow-up. The trial was registered in

Chinese Clinical Trials Registry (<http://www.chictr.org.cn>) on April 4th, 2022 (Registration number ChiCTR2200058291). The detailed trial flow is described in figure 1.

### Study objectives

There are two specific objectives of this Phase II clinical trial:

1. To evaluate the efficacy and safety of percutaneous intradiscal injections of ADMSCs combined with HA hydrogel in the treatment of patients with DLBP.
2. To determine the optimal therapeutic dose of ADMSCs.

### Simple size and calculation

As a previous study indicated that after transplantation of 18 million allogeneic BMSCs, the mean visual analogue scale (VAS) score of IDD patients was reduced to  $37.63 \pm 10.27$  (10.3 reduction) after 24 months<sup>[55]</sup>, we set this indicator at 10.6 reduction after 24 months of transplantation treatment. Furthermore, we assumed that  $\alpha$  was 0.05,  $\beta$  was 0.1, and the dropout rate was 20%. Therefore, the calculated sample size for each group was 25, and the total sample size was 100 patients.

### Eligibility Criteria

Patients with LBP who obtained informed consent will only be allowed to participate in this clinical trial if they meet all the inclusion criteria and none of the exclusion criteria. The inclusion criteria is shown in Table 1, and the exclusion criteria is shown in Table 2.

**Table 1.** Inclusion criteria

---

**Inclusion criteria**

---

1. Patients who are male or female and whose age must be 18 years old or older.
2. Chronic LBP is accompanied by more than two (including two) clinical manifestations: increased pain when abdominal pressure increases such as cough and sneezing, increased pain when sedentary, forward bending or lifting heavy objects, difficult to relieve or unable to maintain the same posture, and pain relief when lying flat and resting.
3. Patients with LBP lasting 1 year or longer after conservative treatment.
4. VAS  $\geq 4$ .
5. ODI  $\geq 30\%$ .
6. MRI shows that the CEPs of the lumbar IVD is Modic type I or II.



7. MRI shows that the L4-5 IVD is Pfirrmann grade 3, 4 or 5.  
 8. Discography of lumbar IVD(s) identified as degenerated by MRI show(s) that the patients have only one disc of L4-5 level with similar pain as usual.  
 9. Patients with  $\geq 20\%$  loss of lumbar disc height compared to normal adjacent discs based on X-ray assessment  
 10. Patients with no active infection (such as HBsAg, HIV, CMV and rubella virus).

LBP: Low back pain; VAS: Visual analog scale; ODI: Oswestry disability index; MRI: Magnetic resonance imaging; CEPs: Cartilage endplates; IVD: intervertebral disc; HBsAg: Hepatitis B surface antigen; HIV: Human immunodeficiency virus; CMV: Cytomegalovirus.

**Table 2.** Exclusion criteria

---

**Exclusion criteria**

---

1. Patients with spondylitis or vertebral fractures.
2. Surgery is required for patients with severe lumbar spinal stenosis or prolapse of the lumbar NP resulting in severe nerve compression and pain in the lower limbs.
3. Patients who have received any intradiscal injection procedure (eg, injection of corticosteroids, methylene blue, dextrose, or glucosamine and chondroitin sulfate) within 1 year prior to receiving transplantation therapy.
4. Dynamic X-ray examination of the lumbar spine shows that the adjacent vertebral body slips  $> 3$  mm or is angled  $> 15^\circ$ .
5. Patients with severe osteoporosis with a BMD T value of -2.5 or lower on DEXA.
6. Pregnant or lactating women, or women who become pregnant within 24 months after receiving intervention.
7. Patients with mental illness or drug addictions or alcohol addictions or those incapable of understanding the purpose or methods of the study.
8. Patients with a history of various systemic diseases such as cancer, autoimmune disease, blood diseases, kidney diseases, or liver diseases.
9. Patients who are allergic to HA, contrast agents, or local anesthetics (eg, lidocaine, bupivacaine).
10. Patients who have previously used any other cell product and/or plan to participate in any other stem cell clinical trial during the 2-year follow-up period

---

NP: Nucleus pulposus; BMD: bone mineral density; DEXA: Dual-energy X-ray absorptiometry; HA: Hyaluronic acid.

**Recruitment**

Participants will be recruited from three sources. First, the potentially eligible hospitalized patients diagnosed with DLBP will be approached and recommended for enrollment in this study. Second, physicians will generate a list of patients with DLBP who have not undergone surgery from the hospital's electronic records. Researchers or physicians will contact these patients by phone and recommend them to participate in the study. Third, physicians will post study flyers at the outpatient department and the official website for patients diagnosed with DLBP at other hospitals, and if they are interested in this study, we will initiate the screening process.



### **ADMSCs preparation and culture**

All eligible patients have 150 ml of subcutaneous adipose tissue harvested by clinicians in the operating room through liposuction under local anesthesia 3 weeks before transplantation, and the patients are discharged after a 4-hour observation period. The harvested adipose tissue will be shipped to the cell factory. ADMSCs will be obtained by washing, enzymatically dissociating, and centrifuging the adipose tissue using strict aseptic techniques. The cells will be plated on flasks and cultured at 37 °C in a humidified incubator under a 5% CO<sub>2</sub> atmosphere. ADMSCs used in this clinical trial will be obtained from cultured third-generation cells. These cells surface markers are positive for CD44, CD73, CD29 and negative for CD45 by flow cytometry, and the final products are tested to rule out the growth of aerobes, anaerobic bacteria and mycoplasma. In addition, cytogenetic analysis will be performed to rule out abnormal karyotypes. The cells are suspended at a concentration of  $20 \times 10^6$  cells/ml of normal saline/vial, and these suspensions are transported to the operating room of the institute in a cold box at approximately 4 °C.

### **Preparation of HA hydrogel for cell delivery**

The molecular weight of HA plays an important role in modulating the inflammation in LBP during disc repair. It is generally believed that high molecular weight HA inhibits the activation of pro-inflammatory cytokines and matrix-degrading enzymes, whereas low molecular weight HA promotes inflammatory and tissue remodeling<sup>[56-58]</sup>. The implantable HA hydrogel in this trial is prepared by mixing 1% FCH-200 with fibrin solution and incubating it at room temperature for 15 minutes. FCH-200 is a high molecular weight HA (molecular weight: 1800-2200 kDa), purchased from Kikkoman Bio Chemifa Co., Ltd. A previous study has shown that this HA promotes the aggregation of ADMSCs and induce their differentiation towards cartilage<sup>[59]</sup>. Therefore, the scaffold material selected for this clinical trial is HA hydrogel with FCH-200 as the gel matrix.

### **Transplantation of ADMSCs in combination with HA hydrogel**

1  
2  
3  
4 Based on discographic findings and confirmation of IDD with T2-weighted MRI,  
5 symptomatic discs are selected for transplantation. Under C-arm fluoroscopy, clinicians  
6 used spinal needles to percutaneously implant different doses of ADMSCs with the HA  
7 hydrogel or saline into the IVD center via a standard posterolateral approach. The  
8 needle diameter of the spinal needle is 22G. After the transplantation, the patients will  
9 be asked to restrict physical activity for 2 weeks.  
10  
11  
12  
13  
14  
15  
16

### 17 **Randomization and blinding**

18  
19 All the selected subjects are randomly assigned into the group according to the ratio of  
20 1:1:1:1, and the statistician uses R software to generate a random sequence, a total of 4  
21 groups with 25 cases in each group. In this experiment, the random envelope method is  
22 used for grouping concealment. Subjects who meet the eligibility criteria are assigned  
23 random numbers (001-100) in the order of enrollment, and then open the random  
24 envelopes with the corresponding numbers to obtain the corresponding grouping  
25 information.  
26  
27  
28  
29  
30  
31  
32

33 This trial adopts a double-blind design. The injections of the control group and the  
34 injections of the experimental groups are completely identical in appearance. During  
35 the transplantation treatment, both the patients and the clinicians performing the  
36 transplantation will be blinded. A statistician generates random numbers and  
37 corresponding drug codes, and then distributes and packs the drugs according to the  
38 codes, and prepares corresponding emergency letters. The computer program that  
39 generates the random numbers and the drug codes are kept as a blind bottom. Blind  
40 bases are in duplicate and kept in the trial responsible unit and agency respectively. A  
41 two-level blind design was adopted, the first level was the group corresponding to each  
42 case number, and the second level was the treatment corresponding to each group. The  
43 pharmacist dispenses the test drug and the placebo into a small sachet according to a  
44 single infusion dose. The sachets have the same shape and are opaque, and are marked  
45 with the serial number corresponding to the intervention category determined by the  
46 random number. Allocation tables recording serial numbers, random numbers, and  
47 group markers are kept in triplicate by the trial designer, the pharmaceutical company,  
48  
49  
50  
51  
52  
53  
54  
55  
56  
57  
58  
59  
60

1  
2  
3  
4 and the pharmacy, respectively. Neither the trial designer nor the pharmacist participate  
5  
6 in the trial.  
7  
8

### 9 10 **Intervention**

11 During the third week after liposuction, the subjects receive different doses of stem cell  
12 mixtures or placebos transplant. Subjects in the high-dose group receive a mixture that  
13 includes 1 ml of stem cell suspension ( $20 \times 10^6$  cells/disc), and 1 ml of HA hydrogel;  
14  
15 Subjects in the mid-dose group receive a mixture that includes 0.5 ml of stem cell  
16 suspension ( $10 \times 10^6$  cells/disc), 0.5 ml of normal saline, and 1 ml of HA hydrogel;  
17  
18 Subjects in the low-dose group receive a mixture that includes 0.25 ml of stem cell  
19 suspension ( $5 \times 10^6$  cells/disc), 0.75 ml of normal saline and 1 ml of HA hydrogel;  
20  
21 Subjects in the control group receives 2 ml of normal saline injection. Because the  
22 purpose of this study is to investigate the efficacy and safety of stem cells combined  
23 with HA hydrogel in the treatment of DLBP, there is no separate HA hydrogel control  
24 group. During the transplant process, neither the subjects nor the clinicians know the  
25 specific transplant treatment drug and doses.  
26  
27  
28  
29  
30  
31  
32  
33  
34  
35  
36

### 37 **Outcome evaluation**

38 The primary endpoint of this trial is improvement in visual analogue scale (VAS) from  
39 baseline (prior to the transplantation) at each follow-up time point. Secondary endpoints  
40 include Oswestry disability index (ODI), Japanese orthopaedic association (JOA)  
41 scores, the Mos 36-item short form (SF-36), the Modic classification, Pfirrmann grade,  
42 height and segment range of motion of the IVD, vital signs (temperature, pulse,  
43 respiration, blood pressure), blood routine, liver and kidney function, immunological  
44 examination, urinalysis, and treatment emergent adverse events. Each follow-up time  
45 point will be conducted by telephone and outpatient contacts. Patients or their families  
46 will be reminded by phone the day before the follow-ups. The corresponding outcome  
47 measures and their time frames are listed in Table 3.  
48  
49  
50  
51  
52  
53  
54  
55  
56  
57  
58  
59  
60

**Table 3.** Outcome measures and time frames

| <b>Outcome measures</b>    |                                                              | <b>Time frames</b>                                 |
|----------------------------|--------------------------------------------------------------|----------------------------------------------------|
| Primary outcome measures   | VAS score                                                    | At baseline, 1 week, 1, 3, 6, 12, 18 and 24 months |
| Secondary outcome measures | ODI score                                                    | At baseline, 1 week, 1, 3, 6, 12, 18 and 24 months |
|                            | JOA scores system                                            |                                                    |
|                            | SF-36 health survey score                                    |                                                    |
|                            | The Modic changes of the IVD                                 | At baseline, 6, 12, 24 months                      |
|                            | The Pfirrmann grade of the IVD                               |                                                    |
|                            | Disc height                                                  |                                                    |
|                            | Segment range of motion                                      |                                                    |
|                            | Vital signs: temperature, pulse, respiration, blood pressure | At 1 week, 1, 3, 6, 12, 18 and 24 months           |
|                            | Blood routine                                                |                                                    |
|                            | Liver and kidney function                                    |                                                    |
|                            | Immunological examination                                    |                                                    |
|                            | Urinalysis                                                   |                                                    |
|                            | Treatment emergent adverse event                             |                                                    |

VAS: Visual analogue scale; ODI: Oswestry disability index; JOA: Japanese orthopaedic association; SF-36: the Mos 36-item short form; IVD: intervertebral disc.

### **Adverse events**

Adverse events (AE) are defined as adverse medical events that occur after the patient signs informed consent until completion of the follow-up period. AE include abnormal laboratory results, symptoms, or diseases. If the AE is confirmed to be a treatment related adverse reaction, it will be reported according to the adverse reaction reporting procedure of the research center. Once an AE occurs, the clinician will conduct necessary treatment according to the patient's condition and decide whether to suspend the clinical study. Serious AE (SAE) refer to life-threatening medical events such as paralysis, tumors, serious infections and even death of patients during clinical trials. In terms of SAE, clinicians should treat it as an emergency and will follow the principle of priority treatment. The researcher will report to the head of the center and the ethics committee of the research unit within 12 hours of the first learning, and report to the team leader within 24 hours or no later than the second working day. At the same time, researchers must handle the communication and aftermath of the subjects and their families.

### **Withdrawal**

Discontinuation can occur as a result of SAE such as paralysis, tumors, serious

1  
2  
3  
4 infections or even death, other serious diseases limiting participation, or withdrawal by  
5 the subject requesting the study to be stopped. Those subjects who withdraw from the  
6 trial will have their withdrawal reasons and all observations recorded. New participants  
7 will not be recruited to replace withdrawn participants.  
8  
9  
10

### 11 12 13 **Data and safety monitoring** 14

15 The members of the Data and Safety Monitoring Board (DSMB) are independent of the  
16 trial investigators and have no competing interests. Clinical safety and efficacy data  
17 collected at the time intervals specified in the protocol will be reviewed and evaluated  
18 by the DSMB. The DSMB will be notified if the safety data threshold exceeds a  
19 predefined threshold. Additionally, the DSMB will conduct an interim analysis of all  
20 AE occurrences every six months during the course of the study. All investigators and  
21 monitors will have access to the electronic trial data during the data collection period;  
22 after completion of the trial, the data will also be accessible to statisticians. All of the  
23 data will be provided to the DSMB.  
24  
25  
26  
27  
28  
29  
30  
31  
32  
33

### 34 35 **Data collection** 36

37 The data generated during the trial will be recorded in the original medical record and  
38 the case report form (CRF). To ensure that the data are entered accurately into the CRF,  
39 quality control personnel check the consistency of the CRF data with the original record.  
40 There are eight data collection points: baseline, 1 week, 1 month, 3 months, 6 months,  
41 12 months, 18 months and 24 months. Research records will be submitted within 3 days  
42 of the completion of the data collection to the research leader for review and all data  
43 will be submitted within 10 days to the project leader. Next, the auditor will examine  
44 each original research record to ensure that the clinical trial data records are accurate,  
45 precise, and standardized. Data checks and entries will then be disposed of by the  
46 statistical data manager and analyzed by the statisticians.  
47  
48  
49  
50  
51  
52  
53  
54  
55  
56  
57

### 58 **Patient and public involvement** 59

60 The patients and public were not involved in the design, or conduct, or reporting or

1  
2  
3  
4 dissemination plans of our research.  
5  
6

### 7 **Statistical analysis**

8  
9 Statistical analysis will be performed using SPSS 22.0 software. All statistical tests are  
10 two-sided, the test level is  $\alpha=0.05$ , and the confidence interval is 95% confidence level.  
11  
12 The primary focus of the data analysis is to determine the effect of any treatment at  
13 each follow-up point (1 week and 1, 3, 6, 12, 18, and 24 months post-transplant). In  
14 addition, linear mixed models are applied to assess differences in treatment effect  
15 between groups at each follow-up point. In addition, linear mixed models are applied  
16 to assess differences in treatment effect between groups ( $20 \times 10^6$  cells/disc,  
17  $10 \times 10^6$  cells/disc, and  $5 \times 10^6$  cells/disc) at each follow-up point. According to the type  
18 of variables and data distribution, *t* test, analysis of variance or nonparametric test is  
19 used for measurement data, and  $\chi^2$  test is used for enumeration data. The safety  
20 evaluation is mainly based on descriptive statistical analysis, listing adverse events,  
21 serious adverse events, the number of times leading to adverse events, and calculating  
22 the incidence.  
23  
24  
25  
26  
27  
28  
29  
30  
31  
32  
33  
34  
35  
36

### 37 **Rules for unblinding**

38  
39 Unblinding is carried out according to normal procedures if no subject pregnancy or  
40 other emergency occurs during the course of the trial. First, after checking the CRF and  
41 signature, the grouping of subjects will be clarified through first-level unblinding for  
42 statistical analysis. Second, after the statistical analysis, the corresponding control and  
43 experimental groups will be identified through secondary unblinding to evaluate the  
44 efficacy of stem cell injections. If there is an emergency, emergency unblinding can  
45 only be performed if the investigator must have information on the treatment  
46 assignment of subjects in emergency. The investigator will unblind according to the  
47 treatment information provided by the subject in the emergency letter, and then  
48 complete the unblinding record form and note it on the CRF. After the trial, the number,  
49 reason, scope and time of emergency unblinding should be described and analyzed as  
50 a reference for the evaluation of efficacy and safety.  
51  
52  
53  
54  
55  
56  
57  
58  
59  
60

## DISCUSSION

This Phase II clinical trial will answer two key questions for patients and the scientific community. First, whether autologous cultured ADMSCs combined with HA hydrogel is safe and effective in the treatment of DLBP. Second, what is the optimal dose of ADMSCs for the treatment of DLBP. Although many studies have been conducted on BMSCs, and the results of phase III clinical trials have also demonstrated their efficacy, the invasiveness of obtaining BMSCs makes many patients hesitant. The emergence of ADMSCs perfectly fills this gap and makes stem cell therapy more acceptable to patients, which will greatly promote stem cell therapy to the clinic. However, stem cell therapy also faces challenges. First of all, in vitro studies have shown that the harsh microenvironment inside the degenerated IVD will affect the biological behaviors of stem cells, such as viability, proliferation and differentiation, and then affect the therapeutic effect of stem cell therapy<sup>[60,61]</sup>. Secondly, the clinical research on ADMSCs is still in a relatively immature stage, and the specific therapeutic mechanism of stem cells is still lacking in-depth understanding. Therefore, it is necessary for us to carry out more clinical trials to further explore. Although there are relatively few clinical trials for DLBP treatment, ADMSCs are still a promising type of MSCs. The successful implementation of this clinical trial will provide data support for subsequent phase III clinical trials, and will also significantly promote the clinical application of ADMSCs. DLBP patients are about to usher in a new era of ADMSCs therapy.

## ETHICS AND DISSEMINATION

The study protocol has been approved by the Ethics Committee of the First Affiliated Hospital of Dalian Medical University and registered in Chinese Clinical Trial Registry. Dissemination of the results will be presented at a conference and in peer-reviewed publications. An insurance company will provide insurance coverage for damages



1  
2  
3  
4 emerging from the trial.  
5  
6

### 7 **Protocol amendments**

8  
9 All protocol amendments will be evaluated by the Ethics Committee and the Chinese  
10 National Medical Products Administration, following the principles of Good Clinical  
11 Practice and national legislation. All modifications of the study protocol will be  
12 communicated by updating the trial registry at Chinese Clinical Trials Registry  
13 (<http://www.chictr.org.cn>).  
14  
15  
16  
17  
18  
19

### 20 **Availability of data and materials**

21  
22 All the data in the trial will be available for anyone who wants to access the data  
23 following publication.  
24  
25  
26  
27  
28

### 29 **Dissemination policy**

30  
31 Output from this study will include journal publications, conference presentations and  
32 community reporting. Output will not identify participants.  
33  
34  
35

### 36 **Author affiliations**

37  
38 <sup>1</sup>Department of Orthopedics, First Affiliated Hospital of Dalian Medical University,  
39 Dalian, the People's Republic of China

40  
41 <sup>2</sup>Key Laboratory of Molecular Mechanism for Repair and Remodeling of Orthopedic  
42 Diseases, Liaoning Province, the People's Republic of China  
43

44  
45 **Author Contributions** ZHL contributed to the conception and design of the study. JZ  
46 wrote the first draft of the manuscript. WTZ, TZS, and MY supervised the manuscript.  
47 All authors contributed to manuscript revision and approved the submitted version.  
48

49  
50 **Funding** This study was supported by the open project of Key Laboratory for  
51 Micro/Nano Technology and System of Liaoning Province, Dalian University of  
52 Technology (20210101). The funders had no role in the study design, data collection  
53 and analysis, decision to publish, or preparation of the manuscript.  
54  
55

56  
57 **Competing interests** All authors declare to have no competing interest concerning this  
58 work.  
59

60 **Patient consent for publication** Not required.



## REFERENCES

1. Knezevic NN, Candido KD, Vlaeyen JWS, et al. Low back pain. *Lancet (London, England)*. 2021;398(10294):78-92.
2. Hurwitz EL, Randhawa K, Yu H, et al. The Global Spine Care Initiative: a summary of the global burden of low back and neck pain studies. *European spine journal : official publication of the European Spine Society, the European Spinal Deformity Society, and the European Section of the Cervical Spine Research Society*. 2018;27(Suppl 6):796-801.
3. Hoy D, Bain C, Williams G, et al. A systematic review of the global prevalence of low back pain. *Arthritis and rheumatism*. 2012;64(6):2028-2037.
4. Schneider BJ, Hunt C, Conger A, et al. The effectiveness of intradiscal biologic treatments for discogenic low back pain: a systematic review. *Spine J*. 2022;22(2):226-237.
5. Verrills P, Nowesenitz G, Barnard A. Prevalence and Characteristics of Discogenic Pain in Tertiary Practice: 223 Consecutive Cases Utilizing Lumbar Discography. *Pain medicine (Malden, Mass)*. 2015;16(8):1490-1499.
6. Mosley GE, Evashwick-Rogler TW, Lai A, et al. Looking beyond the intervertebral disc: the need for behavioral assays in models of discogenic pain. *Annals of the New York Academy of Sciences*. 2017;1409(1):51-66.
7. Fujii K, Yamazaki M, Kang JD, et al. Discogenic Back Pain: Literature Review of Definition, Diagnosis, and Treatment. *JBMR plus*. 2019;3(5):e10180.
8. Yang G, Liao W, Shen M, et al. Insight into neural mechanisms underlying discogenic back pain. *Journal of International Medical Research*. 2018;46(11):4427-4436.
9. Molinos M, Almeida CR, Caldeira J, et al. Inflammation in intervertebral disc degeneration and regeneration. *Journal of The Royal Society Interface*. 2015;12(104):20141191.
10. Wang Y, Che M, Xin J, et al. The role of IL-1 $\beta$  and TNF- $\alpha$  in intervertebral disc degeneration. *Biomedicine & Pharmacotherapy*. 2020;131:110660.
11. Ohtori S, Miyagi M, Inoue G. Sensory nerve ingrowth, cytokines, and instability of discogenic low back pain: A review. *Spine surgery and related research*. 2018;2(1):11-17.
12. Desmoulin GT, Pradhan V, Milner TE. Mechanical Aspects of Intervertebral Disc Injury and Implications on Biomechanics. *Spine (Phila Pa 1976)*. 2020;45(8):E457-e464.
13. Rahyussalim AJ, Zufar MLL, Kurniawati T. Significance of the Association between Disc Degeneration Changes on Imaging and Low Back Pain: A Review Article. *Asian spine journal*. 2020;14(2):245-257.
14. Wang H, Li Z, Zhang C, et al. Correlation between high-intensity zone on MRI and discography in patients with low back pain. *Medicine*. 2017;96(30):e7222.
15. Peng BG. Pathophysiology, diagnosis, and treatment of discogenic low back pain. *World journal of orthopedics*. 2013;4(2):42-52.
16. Yang S, Boudier-Revéret M, Chang MC. Use of Pulsed Radiofrequency for the Treatment of Discogenic Back Pain: A Narrative Review. *Pain practice : the official journal of World Institute of Pain*. 2021;21(5):594-601.
17. Michalik AJ, Patel RK. Evaluation of transforaminal epidural steroid injections for discogenic axial lumbosacral back pain utilizing PROMIS as an outcome measure. *Spine J*. 2021;21(2):202-211.
18. Zhao L, Manchikanti L, Kaye AD, et al. Treatment of Discogenic Low Back Pain: Current

- 1  
2  
3 Treatment Strategies and Future Options-a Literature Review. *Current pain and headache reports*. 2019;23(11):86.
- 4  
5  
6 19. Luo L, Zhang C, Zhou Q, et al. Effectiveness of Transpedicular Dynamic Stabilization in Treating  
7 Discogenic Low Back Pain. *World neurosurgery*. 2018;111:e192-e198.
- 8  
9 20. Vieli M, Staartjes VE, Eversdijk HAJ, et al. Safety and Efficacy of Anterior Lumbar Interbody  
10 Fusion for Discogenic Chronic Low Back Pain in a Short-stay Setting: Data From a Prospective  
11 Registry. *Cureus*. 2019;11(8):e5332.
- 12  
13 21. Yang S, Zhang F, Ma J, et al. Intervertebral disc ageing and degeneration: The antiapoptotic  
14 effect of oestrogen. *Ageing research reviews*. 2020;57:100978.
- 15  
16 22. Clarke LE, McConnell JC, Sherratt MJ, et al. Growth differentiation factor 6 and transforming  
17 growth factor-beta differentially mediate mesenchymal stem cell differentiation, composition,  
18 and micromechanical properties of nucleus pulposus constructs. *Arthritis Res Ther*.  
19 2014;16(2):R67.
- 20  
21 23. Liu XY, Yang LP, Zhao L. Stem cell therapy for Alzheimer's disease. *World J Stem Cells*.  
22 2020;12(8):787-802.
- 23  
24 24. Protze SI, Lee JH, Keller GM. Human Pluripotent Stem Cell-Derived Cardiovascular Cells: From  
25 Developmental Biology to Therapeutic Applications. *Cell stem cell*. 2019;25(3):311-327.
- 26  
27 25. Chen S, Du K, Zou C. Current progress in stem cell therapy for type 1 diabetes mellitus. *Stem  
28 Cell Res Ther*. 2020;11(1):275.
- 29  
30 26. Dolstra H, Roeven MWH, Spanholtz J, et al. Successful Transfer of Umbilical Cord Blood CD34(+)  
31 Hematopoietic Stem and Progenitor-derived NK Cells in Older Acute Myeloid Leukemia  
32 Patients. *Clinical cancer research : an official journal of the American Association for Cancer  
33 Research*. 2017;23(15):4107-4118.
- 34  
35 27. Miguélez-Rivera L, Pérez-Castrillo S, González-Fernández ML, et al. Immunomodulation of  
36 mesenchymal stem cells in discogenic pain. *Spine J*. 2018;18(2):330-342.
- 37  
38 28. Richardson SM, Kalamegam G, Pushparaj PN, et al. Mesenchymal stem cells in regenerative  
39 medicine: Focus on articular cartilage and intervertebral disc regeneration. *Methods (San  
40 Diego, Calif)*. 2016;99:69-80.
- 41  
42 29. Zhang W, Sun T, Li Y, et al. Application of stem cells in the repair of intervertebral disc  
43 degeneration. *Stem Cell Res Ther*. 2022;13(1):70.
- 44  
45 30. Liu Y, Liu H, Meng Y, et al. [Research progress of endogenous repair strategy in intervertebral  
46 disc]. *Zhongguo xiu fu chong jian wai ke za zhi = Zhongguo xiufu chongjian waike zazhi =  
47 Chinese journal of reparative and reconstructive surgery*. 2021;35(5):636-641.
- 48  
49 31. Noriega DC, Ardura F, Hernández-Ramajo R, et al. Intervertebral Disc Repair by Allogeneic  
50 Mesenchymal Bone Marrow Cells: A Randomized Controlled Trial. *Transplantation*.  
51 2017;101(8):1945-1951.
- 52  
53 32. Noriega DC, Ardura F, Hernández-Ramajo R, et al. Treatment of Degenerative Disc Disease  
54 With Allogeneic Mesenchymal Stem Cells: Long-term Follow-up Results. *Transplantation*.  
55 2021;105(2):e25-e27.
- 56  
57 33. Li X, Wang M, Jing X, et al. Bone Marrow- and Adipose Tissue-Derived Mesenchymal Stem  
58 Cells: Characterization, Differentiation, and Applications in Cartilage Tissue Engineering.  
59 *Critical reviews in eukaryotic gene expression*. 2018;28(4):285-310.
- 60  
34. Grad S, Alini M, Eglin D, et al. Cells and Biomaterials for Intervertebral Disc Regeneration.  
*Synthesis Lectures on Tissue Engineering*. 2010;2(1):1-104.

- 1  
2  
3  
4  
5  
6  
7  
8  
9  
10  
11  
12  
13  
14  
15  
16  
17  
18  
19  
20  
21  
22  
23  
24  
25  
26  
27  
28  
29  
30  
31  
32  
33  
34  
35  
36  
37  
38  
39  
40  
41  
42  
43  
44  
45  
46  
47  
48  
49  
50  
51  
52  
53  
54  
55  
56  
57  
58  
59  
60
35. Wankhade UD, Shen M, Kolhe R, et al. Advances in Adipose-Derived Stem Cells Isolation, Characterization, and Application in Regenerative Tissue Engineering. *Stem Cells Int.* 2016;2016:3206807.
  36. Huang Q, Zou Y, Arno MC, et al. Hydrogel scaffolds for differentiation of adipose-derived stem cells. *Chemical Society reviews.* 2017;46(20):6255-6275.
  37. Wang Y, Zhang Y, Chen K, et al. Injectable nanostructured colloidal gels resembling native nucleus pulposus as carriers of mesenchymal stem cells for the repair of degenerated intervertebral discs. *Materials science & engineering C, Materials for biological applications.* 2021;128:112343.
  38. Zhang C, Gullbrand SE, Schaer TP, et al. Combined Hydrogel and Mesenchymal Stem Cell Therapy for Moderate-Severity Disc Degeneration in Goats. *Tissue engineering Part A.* 2021;27(1-2):117-128.
  39. Chen P, Ning L, Qiu P, et al. Photo-crosslinked gelatin-hyaluronic acid methacrylate hydrogel-committed nucleus pulposus-like differentiation of adipose stromal cells for intervertebral disc repair. *J Tissue Eng Regen Med.* 2019;13(4):682-693.
  40. Russo F, Ambrosio L, Peroglio M, et al. A Hyaluronan and Platelet-Rich Plasma Hydrogel for Mesenchymal Stem Cell Delivery in the Intervertebral Disc: An Organ Culture Study. *International journal of molecular sciences.* 2021;22(6).
  41. Fang Y, Shi L, Duan Z, et al. Hyaluronic acid hydrogels, as a biological macromolecule-based platform for stem cells delivery and their fate control: A review. *Int J Biol Macromol.* 2021;189:554-566.
  42. Xiao L, Xu SJ, Liu C, et al. Sod2 and catalase improve pathological conditions of intervertebral disc degeneration by modifying human adipose-derived mesenchymal stem cells. *Life sciences.* 2021;267:118929.
  43. Muttigi MS, Kim BJ, Kumar H, et al. Efficacy of matrilin-3-primed adipose-derived mesenchymal stem cell spheroids in a rabbit model of disc degeneration. *Stem Cell Res Ther.* 2020;11(1):363.
  44. Xu H, Sun M, Wang C, et al. Growth differentiation factor-5-gelatin methacryloyl injectable microspheres laden with adipose-derived stem cells for repair of disc degeneration. *Biofabrication.* 2020;13(1):015010.
  45. Comella K, Silbert R, Parlo M. Effects of the intradiscal implantation of stromal vascular fraction plus platelet rich plasma in patients with degenerative disc disease. *J Transl Med.* 2017;15(1):12.
  46. Kumar H, Ha DH, Lee EJ, et al. Safety and tolerability of intradiscal implantation of combined autologous adipose-derived mesenchymal stem cells and hyaluronic acid in patients with chronic discogenic low back pain: 1-year follow-up of a phase I study. *Stem Cell Res Ther.* 2017;8(1):262.
  47. Garza JR, Campbell RE, Tjoumakaris FP, et al. Clinical Efficacy of Intra-articular Mesenchymal Stromal Cells for the Treatment of Knee Osteoarthritis: A Double-Blinded Prospective Randomized Controlled Clinical Trial. *The American journal of sports medicine.* 2020;48(3):588-598.
  48. Jones IA, Wilson M, Togashi R, et al. A randomized, controlled study to evaluate the efficacy of intra-articular, autologous adipose tissue injections for the treatment of mild-to-moderate knee osteoarthritis compared to hyaluronic acid: a study protocol. *BMC musculoskeletal disorders.* 2018;19(1):383.

- 1  
2  
3  
4  
5  
6  
7  
8  
9  
10  
11  
12  
13  
14  
15  
16  
17  
18  
19  
20  
21  
22  
23  
24  
25  
26  
27  
28  
29  
30  
31  
32  
33  
34  
35  
36  
37  
38  
39  
40  
41  
42  
43  
44  
45  
46  
47  
48  
49  
50  
51  
52  
53  
54  
55  
56  
57  
58  
59  
60
49. Qiao Z, Tang J, Yue B, et al. Human adipose-derived mesenchymal progenitor cells plus microfracture and hyaluronic acid for cartilage repair: a Phase IIa trial. *Regenerative medicine*. 2020;15(1):1193-1214.
  50. Lu L, Dai C, Du H, et al. Intra-articular injections of allogeneic human adipose-derived mesenchymal progenitor cells in patients with symptomatic bilateral knee osteoarthritis: a Phase I pilot study. *Regenerative medicine*. 2020;15(5):1625-1636.
  51. Lee WS, Kim HJ, Kim KI, et al. Intra-Articular Injection of Autologous Adipose Tissue-Derived Mesenchymal Stem Cells for the Treatment of Knee Osteoarthritis: A Phase IIb, Randomized, Placebo-Controlled Clinical Trial. *Stem cells translational medicine*. 2019;8(6):504-511.
  52. Peretti GM, Ulivi M, De Girolamo L, et al. Evaluation of the use of autologous micro-fragmented adipose tissue in the treatment of knee osteoarthritis: preliminary results of a randomized controlled trial. *Journal of biological regulators and homeostatic agents*. 2018;32(6 Suppl. 1):193-199.
  53. Pers YM, Rackwitz L, Ferreira R, et al. Adipose Mesenchymal Stromal Cell-Based Therapy for Severe Osteoarthritis of the Knee: A Phase I Dose-Escalation Trial. *Stem cells translational medicine*. 2016;5(7):847-856.
  54. Freitag J, Ford J, Bates D, et al. Adipose derived mesenchymal stem cell therapy in the treatment of isolated knee chondral lesions: design of a randomised controlled pilot study comparing arthroscopic microfracture versus arthroscopic microfracture combined with postoperative mesenchymal stem cell injections. *BMJ open*. 2015;5(12):e009332.
  55. Amirdelfan K, Bae H, McJunkin T, et al. Allogeneic mesenchymal precursor cells treatment for chronic low back pain associated with degenerative disc disease: a prospective randomized, placebo-controlled 36-month study of safety and efficacy. *Spine J*. 2021;21(2):212-230.
  56. Kazezian Z, Joyce K, Pandit A. The role of hyaluronic acid in intervertebral disc regeneration. *Applied Sciences*. 2020;10(18):6257.
  57. Isa ILM, Srivastava A, Tiernan D, et al. Hyaluronic Acid Based Hydrogels Attenuate Inflammatory Receptors and Neurotrophins in Interleukin-1 $\beta$  Induced Inflammation Model of Nucleus Pulposus Cells. *Biomacromolecules*. 2015;16(6):1714-1725.
  58. Kazezian Z, Sakai D, Pandit A. Hyaluronic Acid Microgels Modulate Inflammation and Key Matrix Molecules toward a Regenerative Signature in the Injured Annulus Fibrosus. *Advanced Biosystems*. 2017;1(10):1700077.
  59. Wu S-C, Chen C-H, Wang J-Y, et al. Hyaluronan size alters chondrogenesis of adipose-derived stem cells via the CD44/ERK/SOX-9 pathway. *Acta Biomaterialia*. 2018;66:224-237.
  60. Vadalà G, Ambrosio L, Russo F, et al. Interaction between Mesenchymal Stem Cells and Intervertebral Disc Microenvironment: From Cell Therapy to Tissue Engineering. *Stem Cells International*. 2019;2019:2376172.
  61. Esquijarosa Hechavarria M, Richard SA. Edifying the Focal Factors Influencing Mesenchymal Stem Cells by the Microenvironment of Intervertebral Disc Degeneration in Low Back Pain. *Pain Research and Management*. 2022;2022:6235400.

## Figure legend

Fig. 1 Study flow diagram

For peer review only

1  
2  
3  
4  
5  
6  
7  
8  
9  
10  
11  
12  
13  
14  
15  
16  
17  
18  
19  
20  
21  
22  
23  
24  
25  
26  
27  
28  
29  
30  
31  
32  
33  
34  
35  
36  
37  
38  
39  
40  
41  
42  
43  
44  
45  
46  
47  
48  
49  
50  
51  
52  
53  
54  
55  
56  
57  
58  
59  
60

1  
2  
3  
4  
5  
6  
7  
8  
9  
10  
11  
12  
13  
14  
15  
16  
17  
18  
19  
20  
21  
22  
23  
24  
25  
26  
27  
28  
29  
30  
31  
32  
33  
34  
35  
36  
37  
38  
39  
40  
41  
42  
43  
44  
45  
46  
47  
48  
49  
50  
51  
52  
53  
54  
55  
56  
57  
58  
59  
60

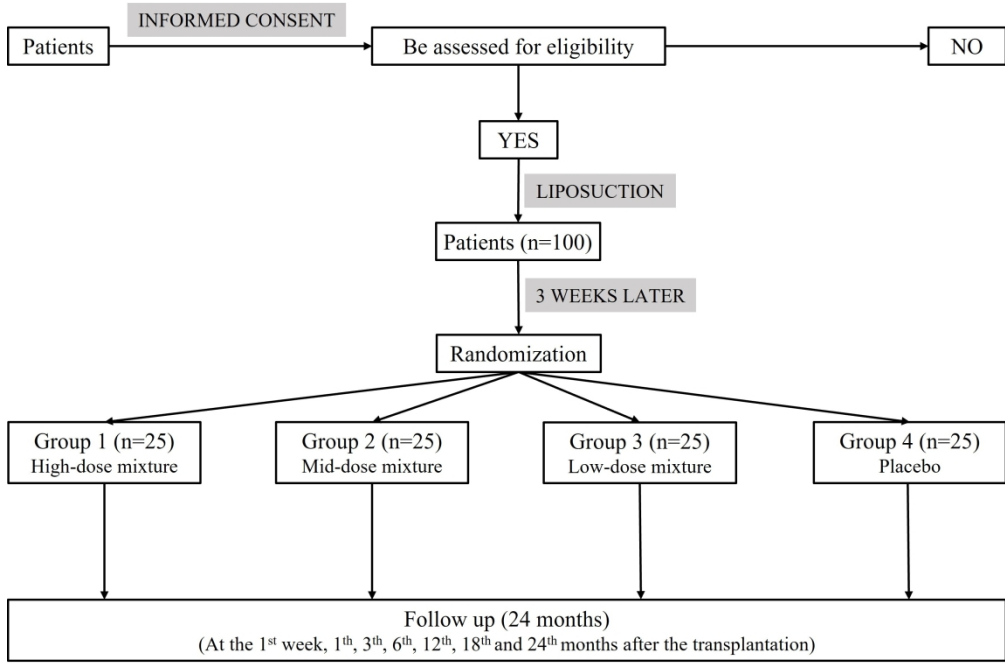

Study flow diagram

252x167mm (330 x 330 DPI)

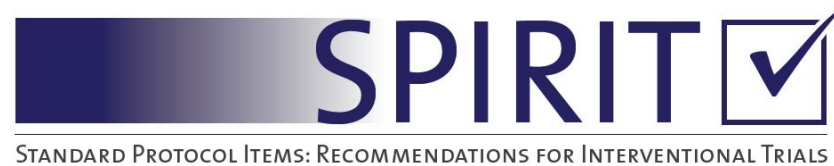

SPIRIT 2013 Checklist: Recommended items to address in a clinical trial protocol and related documents\*

| Section/item                      | Item No | Description                                                                                                                                                                                                                                                                              | Addressed on page number       |
|-----------------------------------|---------|------------------------------------------------------------------------------------------------------------------------------------------------------------------------------------------------------------------------------------------------------------------------------------------|--------------------------------|
| <b>Administrative information</b> |         |                                                                                                                                                                                                                                                                                          |                                |
| Title                             | 1       | Descriptive title identifying the study design, population, interventions, and, if applicable, trial acronym                                                                                                                                                                             | 1                              |
| Trial registration                | 2a      | Trial identifier and registry name. If not yet registered, name of intended registry                                                                                                                                                                                                     | 2                              |
|                                   | 2b      | All items from the World Health Organization Trial Registration Data Set                                                                                                                                                                                                                 | 7-8                            |
| Protocol version                  | 3       | Date and version identifier                                                                                                                                                                                                                                                              | 2022.04.04<br>4/2022, page 7-8 |
| Funding                           | 4       | Sources and types of financial, material, and other support                                                                                                                                                                                                                              | 17                             |
| Roles and responsibilities        | 5a      | Names, affiliations, and roles of protocol contributors                                                                                                                                                                                                                                  | 1, 17                          |
|                                   | 5b      | Name and contact information for the trial sponsor                                                                                                                                                                                                                                       | 1                              |
|                                   | 5c      | Role of study sponsor and funders, if any, in study design; collection, management, analysis, and interpretation of data; writing of the report; and the decision to submit the report for publication, including whether they will have ultimate authority over any of these activities | 17                             |
|                                   | 5d      | Composition, roles, and responsibilities of the coordinating centre, steering committee, endpoint adjudication committee, data management team, and other individuals or groups overseeing the trial, if applicable (see Item 21a for data monitoring committee)                         | 14                             |

1 **Introduction**

2

3 Background and rationale 6a Description of research question and justification for undertaking the trial, including summary of relevant studies (published and unpublished) examining benefits and harms for each intervention 3-7

4

5

6 6b Explanation for choice of comparators 12

7

8 Objectives 7 Specific objectives or hypotheses 8

9

10 Trial design 8 Description of trial design including type of trial (eg, parallel group, crossover, factorial, single group), allocation ratio, and framework (eg, superiority, equivalence, noninferiority, exploratory) 7-8, 11-12

11

12

13

14 **Methods: Participants, interventions, and outcomes**

15

16 Study setting 9 Description of study settings (eg, community clinic, academic hospital) and list of countries where data will be collected. Reference to where list of study sites can be obtained 7-8

17

18

19 Eligibility criteria 10 Inclusion and exclusion criteria for participants. If applicable, eligibility criteria for study centres and individuals who will perform the interventions (eg, surgeons, psychotherapists) 8-9, Table 1, Table 2

20

21

22 Interventions 11a Interventions for each group with sufficient detail to allow replication, including how and when they will be administered 12

23

24

25 11b Criteria for discontinuing or modifying allocated interventions for a given trial participant (eg, drug dose change in response to harms, participant request, or improving/worsening disease) 13-14

26

27

28 11c Strategies to improve adherence to intervention protocols, and any procedures for monitoring adherence (eg, drug tablet return, laboratory tests) 12

29

30

31 11d Relevant concomitant care and interventions that are permitted or prohibited during the trial 10-11

32

33

34 Outcomes 12 Primary, secondary, and other outcomes, including the specific measurement variable (eg, systolic blood pressure), analysis metric (eg, change from baseline, final value, time to event), method of aggregation (eg, median, proportion), and time point for each outcome. Explanation of the clinical relevance of chosen efficacy and harm outcomes is strongly recommended 12-13, Table 3

35

36

37

38

39

40 Participant timeline 13 Time schedule of enrolment, interventions (including any run-ins and washouts), assessments, and visits for participants. A schematic diagram is highly recommended (see Figure) 7-8, Figure 1

41

42



|   |             |    |                                                                                                                                                                                       |   |
|---|-------------|----|---------------------------------------------------------------------------------------------------------------------------------------------------------------------------------------|---|
| 1 | Sample size | 14 | Estimated number of participants needed to achieve study objectives and how it was determined, including clinical and statistical assumptions supporting any sample size calculations | 8 |
| 2 |             |    |                                                                                                                                                                                       |   |
| 3 |             |    |                                                                                                                                                                                       |   |
| 4 | Recruitment | 15 | Strategies for achieving adequate participant enrolment to reach target sample size                                                                                                   | 9 |
| 5 |             |    |                                                                                                                                                                                       |   |

### 6 **Methods: Assignment of interventions (for controlled trials)**

#### 7 Allocation:

|    |                    |     |                                                                                                                                                                                                                                                                                                                                                          |       |
|----|--------------------|-----|----------------------------------------------------------------------------------------------------------------------------------------------------------------------------------------------------------------------------------------------------------------------------------------------------------------------------------------------------------|-------|
| 8  |                    |     |                                                                                                                                                                                                                                                                                                                                                          |       |
| 9  |                    |     |                                                                                                                                                                                                                                                                                                                                                          |       |
| 10 | Sequence           | 16a | Method of generating the allocation sequence (eg, computer-generated random numbers), and list of any factors for stratification. To reduce predictability of a random sequence, details of any planned restriction (eg, blocking) should be provided in a separate document that is unavailable to those who enrol participants or assign interventions | 11-12 |
| 11 | generation         |     |                                                                                                                                                                                                                                                                                                                                                          |       |
| 12 |                    |     |                                                                                                                                                                                                                                                                                                                                                          |       |
| 13 |                    |     |                                                                                                                                                                                                                                                                                                                                                          |       |
| 14 |                    |     |                                                                                                                                                                                                                                                                                                                                                          |       |
| 15 |                    |     |                                                                                                                                                                                                                                                                                                                                                          |       |
| 16 | Allocation         | 16b | Mechanism of implementing the allocation sequence (eg, central telephone; sequentially numbered, opaque, sealed envelopes), describing any steps to conceal the sequence until interventions are assigned                                                                                                                                                | 11-12 |
| 17 | concealment        |     |                                                                                                                                                                                                                                                                                                                                                          |       |
| 18 | mechanism          |     |                                                                                                                                                                                                                                                                                                                                                          |       |
| 19 |                    |     |                                                                                                                                                                                                                                                                                                                                                          |       |
| 20 | Implementation     | 16c | Who will generate the allocation sequence, who will enrol participants, and who will assign participants to interventions                                                                                                                                                                                                                                | 11-12 |
| 21 |                    |     |                                                                                                                                                                                                                                                                                                                                                          |       |
| 22 |                    |     |                                                                                                                                                                                                                                                                                                                                                          |       |
| 23 |                    |     |                                                                                                                                                                                                                                                                                                                                                          |       |
| 24 | Blinding (masking) | 17a | Who will be blinded after assignment to interventions (eg, trial participants, care providers, outcome assessors, data analysts), and how                                                                                                                                                                                                                | 11-12 |
| 25 |                    |     |                                                                                                                                                                                                                                                                                                                                                          |       |
| 26 |                    |     |                                                                                                                                                                                                                                                                                                                                                          |       |
| 27 |                    | 17b | If blinded, circumstances under which unblinding is permissible, and procedure for revealing a participant's allocated intervention during the trial                                                                                                                                                                                                     | 15    |
| 28 |                    |     |                                                                                                                                                                                                                                                                                                                                                          |       |
| 29 |                    |     |                                                                                                                                                                                                                                                                                                                                                          |       |
| 30 |                    |     |                                                                                                                                                                                                                                                                                                                                                          |       |

### 31 **Methods: Data collection, management, and analysis**

|    |                 |     |                                                                                                                                                                                                                                                                                                                                                                                                              |                |
|----|-----------------|-----|--------------------------------------------------------------------------------------------------------------------------------------------------------------------------------------------------------------------------------------------------------------------------------------------------------------------------------------------------------------------------------------------------------------|----------------|
| 32 |                 |     |                                                                                                                                                                                                                                                                                                                                                                                                              |                |
| 33 | Data collection | 18a | Plans for assessment and collection of outcome, baseline, and other trial data, including any related processes to promote data quality (eg, duplicate measurements, training of assessors) and a description of study instruments (eg, questionnaires, laboratory tests) along with their reliability and validity, if known. Reference to where data collection forms can be found, if not in the protocol | 12-13, Table 3 |
| 34 | methods         |     |                                                                                                                                                                                                                                                                                                                                                                                                              |                |
| 35 |                 |     |                                                                                                                                                                                                                                                                                                                                                                                                              |                |
| 36 |                 |     |                                                                                                                                                                                                                                                                                                                                                                                                              |                |
| 37 |                 |     |                                                                                                                                                                                                                                                                                                                                                                                                              |                |
| 38 |                 |     |                                                                                                                                                                                                                                                                                                                                                                                                              |                |
| 39 |                 | 18b | Plans to promote participant retention and complete follow-up, including list of any outcome data to be collected for participants who discontinue or deviate from intervention protocols                                                                                                                                                                                                                    | 14             |
| 40 |                 |     |                                                                                                                                                                                                                                                                                                                                                                                                              |                |
| 41 |                 |     |                                                                                                                                                                                                                                                                                                                                                                                                              |                |
| 42 |                 |     |                                                                                                                                                                                                                                                                                                                                                                                                              |                |

|    |                                 |     |                                                                                                                                                                                                                                                                                                                                       |                |
|----|---------------------------------|-----|---------------------------------------------------------------------------------------------------------------------------------------------------------------------------------------------------------------------------------------------------------------------------------------------------------------------------------------|----------------|
| 1  | Data management                 | 19  | Plans for data entry, coding, security, and storage, including any related processes to promote data quality (eg, double data entry; range checks for data values). Reference to where details of data management procedures can be found, if not in the protocol                                                                     | 15             |
| 2  |                                 |     |                                                                                                                                                                                                                                                                                                                                       |                |
| 3  |                                 |     |                                                                                                                                                                                                                                                                                                                                       |                |
| 4  |                                 |     |                                                                                                                                                                                                                                                                                                                                       |                |
| 5  | Statistical methods             | 20a | Statistical methods for analysing primary and secondary outcomes. Reference to where other details of the statistical analysis plan can be found, if not in the protocol                                                                                                                                                              | 15             |
| 6  |                                 |     |                                                                                                                                                                                                                                                                                                                                       |                |
| 7  |                                 |     |                                                                                                                                                                                                                                                                                                                                       |                |
| 8  |                                 | 20b | Methods for any additional analyses (eg, subgroup and adjusted analyses)                                                                                                                                                                                                                                                              | Not applicable |
| 9  |                                 |     |                                                                                                                                                                                                                                                                                                                                       |                |
| 10 |                                 | 20c | Definition of analysis population relating to protocol non-adherence (eg, as randomised analysis), and any statistical methods to handle missing data (eg, multiple imputation)                                                                                                                                                       | Not applicable |
| 11 |                                 |     |                                                                                                                                                                                                                                                                                                                                       |                |
| 12 |                                 |     |                                                                                                                                                                                                                                                                                                                                       |                |
| 13 |                                 |     |                                                                                                                                                                                                                                                                                                                                       |                |
| 14 | <b>Methods: Monitoring</b>      |     |                                                                                                                                                                                                                                                                                                                                       |                |
| 15 |                                 |     |                                                                                                                                                                                                                                                                                                                                       |                |
| 16 | Data monitoring                 | 21a | Composition of data monitoring committee (DMC); summary of its role and reporting structure; statement of whether it is independent from the sponsor and competing interests; and reference to where further details about its charter can be found, if not in the protocol. Alternatively, an explanation of why a DMC is not needed | 14             |
| 17 |                                 |     |                                                                                                                                                                                                                                                                                                                                       |                |
| 18 |                                 |     |                                                                                                                                                                                                                                                                                                                                       |                |
| 19 |                                 |     |                                                                                                                                                                                                                                                                                                                                       |                |
| 20 |                                 |     |                                                                                                                                                                                                                                                                                                                                       |                |
| 21 |                                 |     |                                                                                                                                                                                                                                                                                                                                       |                |
| 22 |                                 | 21b | Description of any interim analyses and stopping guidelines, including who will have access to these interim results and make the final decision to terminate the trial                                                                                                                                                               | 13-14          |
| 23 |                                 |     |                                                                                                                                                                                                                                                                                                                                       |                |
| 24 |                                 |     |                                                                                                                                                                                                                                                                                                                                       |                |
| 25 | Harms                           | 22  | Plans for collecting, assessing, reporting, and managing solicited and spontaneously reported adverse events and other unintended effects of trial interventions or trial conduct                                                                                                                                                     | 13-14          |
| 26 |                                 |     |                                                                                                                                                                                                                                                                                                                                       |                |
| 27 |                                 |     |                                                                                                                                                                                                                                                                                                                                       |                |
| 28 | Auditing                        | 23  | Frequency and procedures for auditing trial conduct, if any, and whether the process will be independent from investigators and the sponsor                                                                                                                                                                                           | 13-14          |
| 29 |                                 |     |                                                                                                                                                                                                                                                                                                                                       |                |
| 30 |                                 |     |                                                                                                                                                                                                                                                                                                                                       |                |
| 31 |                                 |     |                                                                                                                                                                                                                                                                                                                                       |                |
| 32 | <b>Ethics and dissemination</b> |     |                                                                                                                                                                                                                                                                                                                                       |                |
| 33 |                                 |     |                                                                                                                                                                                                                                                                                                                                       |                |
| 34 | Research ethics approval        | 24  | Plans for seeking research ethics committee/institutional review board (REC/IRB) approval                                                                                                                                                                                                                                             | 16-17          |
| 35 |                                 |     |                                                                                                                                                                                                                                                                                                                                       |                |
| 36 |                                 |     |                                                                                                                                                                                                                                                                                                                                       |                |
| 37 | Protocol amendments             | 25  | Plans for communicating important protocol modifications (eg, changes to eligibility criteria, outcomes, analyses) to relevant parties (eg, investigators, REC/IRBs, trial participants, trial registries, journals, regulators)                                                                                                      | 17             |
| 38 |                                 |     |                                                                                                                                                                                                                                                                                                                                       |                |
| 39 |                                 |     |                                                                                                                                                                                                                                                                                                                                       |                |
| 40 |                                 |     |                                                                                                                                                                                                                                                                                                                                       |                |
| 41 |                                 |     |                                                                                                                                                                                                                                                                                                                                       |                |
| 42 |                                 |     |                                                                                                                                                                                                                                                                                                                                       |                |
| 43 |                                 |     |                                                                                                                                                                                                                                                                                                                                       |                |
| 44 |                                 |     |                                                                                                                                                                                                                                                                                                                                       |                |
| 45 |                                 |     |                                                                                                                                                                                                                                                                                                                                       |                |
| 46 |                                 |     |                                                                                                                                                                                                                                                                                                                                       |                |

|    |                               |     |                                                                                                                                                                                                                                                                                     |                      |
|----|-------------------------------|-----|-------------------------------------------------------------------------------------------------------------------------------------------------------------------------------------------------------------------------------------------------------------------------------------|----------------------|
| 1  | Consent or assent             | 26a | Who will obtain informed consent or assent from potential trial participants or authorised surrogates, and how (see Item 32)                                                                                                                                                        | 7-8                  |
| 2  |                               |     |                                                                                                                                                                                                                                                                                     |                      |
| 3  |                               |     |                                                                                                                                                                                                                                                                                     |                      |
| 4  |                               | 26b | Additional consent provisions for collection and use of participant data and biological specimens in ancillary studies, if applicable                                                                                                                                               | Not applicable       |
| 5  |                               |     |                                                                                                                                                                                                                                                                                     |                      |
| 6  |                               |     |                                                                                                                                                                                                                                                                                     |                      |
| 7  | Confidentiality               | 27  | How personal information about potential and enrolled participants will be collected, shared, and maintained in order to protect confidentiality before, during, and after the trial                                                                                                | 14                   |
| 8  |                               |     |                                                                                                                                                                                                                                                                                     |                      |
| 9  |                               |     |                                                                                                                                                                                                                                                                                     |                      |
| 10 | Declaration of interests      | 28  | Financial and other competing interests for principal investigators for the overall trial and each study site                                                                                                                                                                       | 17                   |
| 11 |                               |     |                                                                                                                                                                                                                                                                                     |                      |
| 12 |                               |     |                                                                                                                                                                                                                                                                                     |                      |
| 13 | Access to data                | 29  | Statement of who will have access to the final trial dataset, and disclosure of contractual agreements that limit such access for investigators                                                                                                                                     | 17                   |
| 14 |                               |     |                                                                                                                                                                                                                                                                                     |                      |
| 15 |                               |     |                                                                                                                                                                                                                                                                                     |                      |
| 16 |                               |     |                                                                                                                                                                                                                                                                                     |                      |
| 17 | Ancillary and post-trial care | 30  | Provisions, if any, for ancillary and post-trial care, and for compensation to those who suffer harm from trial participation                                                                                                                                                       | 16-17                |
| 18 |                               |     |                                                                                                                                                                                                                                                                                     |                      |
| 19 |                               |     |                                                                                                                                                                                                                                                                                     |                      |
| 20 | Dissemination policy          | 31a | Plans for investigators and sponsor to communicate trial results to participants, healthcare professionals, the public, and other relevant groups (eg, via publication, reporting in results databases, or other data sharing arrangements), including any publication restrictions | 17                   |
| 21 |                               |     |                                                                                                                                                                                                                                                                                     |                      |
| 22 |                               |     |                                                                                                                                                                                                                                                                                     |                      |
| 23 |                               |     |                                                                                                                                                                                                                                                                                     |                      |
| 24 |                               | 31b | Authorship eligibility guidelines and any intended use of professional writers                                                                                                                                                                                                      | 17                   |
| 25 |                               |     |                                                                                                                                                                                                                                                                                     |                      |
| 26 |                               | 31c | Plans, if any, for granting public access to the full protocol, participant-level dataset, and statistical code                                                                                                                                                                     | 17                   |
| 27 |                               |     |                                                                                                                                                                                                                                                                                     |                      |
| 28 |                               |     |                                                                                                                                                                                                                                                                                     |                      |
| 29 | <b>Appendices</b>             |     |                                                                                                                                                                                                                                                                                     |                      |
| 30 |                               |     |                                                                                                                                                                                                                                                                                     |                      |
| 31 | Informed consent materials    | 32  | Model consent form and other related documentation given to participants and authorised surrogates                                                                                                                                                                                  | Available on request |
| 32 |                               |     |                                                                                                                                                                                                                                                                                     |                      |
| 33 |                               |     |                                                                                                                                                                                                                                                                                     |                      |
| 34 | Biological specimens          | 33  | Plans for collection, laboratory evaluation, and storage of biological specimens for genetic or molecular analysis in the current trial and for future use in ancillary studies, if applicable                                                                                      | Not applicable       |
| 35 |                               |     |                                                                                                                                                                                                                                                                                     |                      |
| 36 |                               |     |                                                                                                                                                                                                                                                                                     |                      |

\*It is strongly recommended that this checklist be read in conjunction with the SPIRIT 2013 Explanation & Elaboration for important clarification on the items. Amendments to the protocol should be tracked and dated. The SPIRIT checklist is copyrighted by the SPIRIT Group under the Creative Commons [“Attribution-NonCommercial-NoDerivs 3.0 Unported”](https://creativecommons.org/licenses/by-nc-nd/3.0/) license.
